# Supplementary material for: Ferroptosis-Related Long Non-Coding RNA Signature Contributes to the Prediction of Prognosis Outcomes in Head and Neck Squamous Cell Carcinomas
Source: Front Genet. 2021 Dec 17;12:785839. doi: 10.3389/fgene.2021.785839 (PMC8718757; doi:10.3389/fgene.2021.785839)
Supplement: Supplementary file 2 [file DataSheet2.xlsx]

## Sheet: Table S1
Table S1. Ferroptosis-related genes.
Symbol	Type	Name	PMID
RPL8	Driver	Ribosomal protein L8	22632970
IREB2	Driver	Iron response element binding protein 2	22632970
ATP5MC3	Driver	ATP synthase membrane subunit c locus 3	22632970
CS	Driver	Citrate synthase	22632970
EMC2	Driver	ER membrane protein complex subunit 2	22632970
ACSF2	Driver	Acyl-CoA synthetase family member 2	22632970
NOX1	Driver	Nicotinamide adenine dinucleotide phosphate (NADPH) oxidase (NOX) 1	22632970
CYBB	Driver	Cytochrome b-245 beta chain	22632970
NOX3	Driver	Nicotinamide adenine dinucleotide phosphate (NADPH) oxidase (NOX) 3	22632970
NOX4	Driver	Nicotinamide adenine dinucleotide phosphate (NADPH) oxidase (NOX) 4	22632970
NOX5	Driver	Nicotinamide adenine dinucleotide phosphate (NADPH) oxidase (NOX) 5	22632970
DUOX1	Driver	Dual oxidase 1	22632970
DUOX2	Driver	Dual oxidase 2	22632970
G6PD	Driver	Glucose-6-phosphate dehydrogenase	22632970
PGD	Driver	Phosphoglycerate dehydrogenase	22632970
VDAC2	Driver	Valtage-dependent anion channels 2	22632970
PIK3CA	Driver	Phosphatidylinositol-4,5-bisphosphate 3-kinase catalytic subunit alpha	24739485
FLT3	Driver	Fms related tyrosine kinase 3	24739485
SCP2	Driver	Sterol carrier protein 2	25402683
TP53	Driver	Tumor protein p53	25799988
ACSL4	Driver	Acyl-CoA synthetase long chain family member 4	25965523
LPCAT3	Driver	Lysophosphatidylcholine acyltransferase 3	25965523
NRAS	Driver	NRAS proto-oncogene, GTPase	26157704
KRAS	Driver	KRAS proto-oncogene, GTPase	26157704
HRAS	Driver	HRas proto-oncogene, GTPase	26157704
TF	Driver	Transferrin	26166707
TFRC	Driver	Transferrin receptor	26166707
TFR2	Driver	Transferrin receptor 2	26166707
SLC38A1	Driver	Solute carrier family 38 member 1	26166707
SLC1A5	Driver	Solute carrier family 1 member 5	26166707
GLS2	Driver	Glutaminase 2	26166707
GOT1	Driver	Glutamic-oxaloacetic transaminase 1	26166707
CARS1	Driver	Cysteinyl-tRNA synthetase 1	26184909
TP53	Driver	Tumor protein p53	26218928
ALOX5	Driver	Arachidonate 5-lipoxygenase	26235588
KEAP1	Driver	Kelch like ECH associated protein 1	26403645
HMOX1	Driver	Heme oxygenase 1	26405158
TP53	Driver	Tumor protein p53	26943586
TP53	Driver	Tumor protein p53	27034505
GLS2	Driver	Glutaminase 2	27034505
ATG5	Driver	Autophagy related 5	27245739
ATG7	Driver	Autophagy related 7	27245739
NCOA4	Driver	Nuclear receptor coactivator 4	27245739
TF	Driver	Transferrin	27441659
ALOX5	Driver	Arachidonate 5-lipoxygenase	27506793
ALOX12	Driver	Arachidonate 12-lipoxygenase, 12S type	27506793
ALOX12B	Driver	Arachidonate 12-lipoxygenase, 12R type	27506793
ALOX15	Driver	Arachidonate 15-lipoxygenase	27506793
ALOX15B	Driver	Arachidonate 15-lipoxygenase type B	27506793
ALOXE3	Driver	Arachidonate lipoxygenase 3	27506793
PHKG2	Driver	Phosphorylase kinase catalytic subunit gamma 2	27506793
TFRC	Driver	Transferrin receptor	27514700
ACO1	Driver	Aconitase 1	27514700
IREB2	Driver	iron responsive element binding protein 2	27514700
SLC38A1	Driver	Solute carrier family 38 member 1	27514700
GLS2	Driver	Glutaminase 2	27514700
G6PDX	Driver	_NA_	27514700
ULK1	Driver	Unc-51 like autophagy activating kinase 1	27514700
ATG3	Driver	Autophagy related 3	27514700
ATG4D	Driver	Autophagy related 4D cysteine peptidase	27514700
ATG5	Driver	Autophagy related 5	27514700
BECN1	Driver	Beclin 1	27514700
MAP1LC3A	Driver	Microtubule associated protein 1 light chain 3 alpha	27514700
GABARAPL2	Driver	GABA type A receptor associated protein like 2	27514700
GABARAPL1	Driver	GABA type A receptor associated protein like 1	27514700
ATG16L1	Driver	Autophagy related 16 like 1	27514700
WIPI1	Driver	WD repeat domain, phosphoinositide interacting 1	27514700
WIPI2	Driver	WD repeat domain, phosphoinositide interacting 2	27514700
SNX4	Driver	Sorting nexin 4	27514700
ATG13	Driver	Autophagy related 13	27514700
ULK2	Driver	Unc-51 like autophagy activating kinase 2	27514700
NCOA4	Driver	Nuclear receptor coactivator 4	27514700
ACSL4	Driver	Acyl-CoA synthetase long chain family member 4	27565726
TP53	Driver	Tumor protein p53	27705786
SAT1	Driver	Spermidine/spermine N1-acetyltransferase 1	27698118
ALOX15	Driver	Arachidonate 15-lipoxygenase	27698118
ACSL4	Driver	Acyl-CoA synthetase long chain family member 4	27842066
LPCAT3	Driver	Lysophosphatidylcholine acyltransferase 3	27842066
ALOX15	Driver	Arachidonate 15-lipoxygenase	27842066
ACSL4	Driver	Acyl-CoA synthetase long chain family member 4	27842070
KEAP1	Driver	Kelch like ECH associated protein 1	28012440
EGFR	Driver	Epidermal growth factor receptor	28297659
NOX4	Driver	NADPH oxidase 4	28297659
MAPK3	Driver	Mitogen-activated protein kinase 3	28297659
MAPK1	Driver	Mitogen-activated protein kinase 1	28297659
BID	Driver	BH3 interacting domain death agonist	28384611
ACSL4	Driver	Acyl-CoA synthetase long chain family member 4	28551825
ZEB1	Driver	Zinc finger E-box binding homeobox 1	28678785
KEAP1	Driver	Kelch like ECH associated protein 1	28805788
DPP4	Driver	Dipeptidyl peptidase 4	28813679
ALOX15	Driver	Arachidonate 15-lipoxygenase	28837253
ALOX12	Driver	Arachidonate 12-lipoxygenase, 12S type	28837253
CDKN2A	Driver	Cyclin dependent kinase inhibitor 2A	28985506
PEBP1	Driver	Phosphatidylethanolamine binding protein 1	29053969
SOCS1	Driver	Suppressor of cytokine signaling 1	29081404
CDO1	Driver	Cysteine dioxygenase type 1	29144989
MYB	Driver	MYB proto-oncogene, transcription factor	29144989
HMOX1	Driver	Heme oxygenase 1	29274359
MAPK8	Driver	Mitogen-activated protein kinase 8	29330409
MAPK9	Driver	Mitogen-activated protein kinase 9	29330409
MAPK1	Driver	Mitogen-activated protein kinase 1	29330409
MAPK3	Driver	Mitogen-activated protein kinase 3	29330409
SLC1A5	Driver	Solute carrier family 1 member 5	29348676
CHAC1	Driver	ChaC glutathione specific gamma-glutamylcyclotransferase 1	29383104
MAPK14	Driver	Mitogen-activated protein kinase 14	29436589
LINC00472	Driver	Long intergenic non-protein coding RNA 472	29588351
NOX4	Driver	NADPH oxidase 4	29702192
GOT1	Driver	Glutamic-oxaloacetic transaminase 1	30035324
BECN1	Driver	Beclin 1	30057310
PRKAA2	Driver	Protein kinase AMP-activated catalytic subunit alpha 2	30057310
PRKAA1	Driver	Protein kinase AMP-activated catalytic subunit alpha 1	30057310
ELAVL1	Driver	ELAV like RNA binding protein 1	30081711
BAP1	Driver	BRCA1 associated protein 1	30202049
TP53	Driver	Tumor protein p53	30321484
ABCC1	Driver	ATP binding cassette subfamily C member 1	30726737
ACSL4	Driver	Acyl-CoA synthetase long chain family member 4	30737476
MIR6852	Driver	microRNA 6852	30787392
ACVR1B	Driver	Activin A receptor type 1B	30804470
TGFBR1	Driver	Transforming growth factor beta receptor 1	30804470
BAP1	Driver	BRCA1 associated protein 1	30907299
EPAS1	Driver	Endothelial PAS domain protein 1	30962421
HILPDA	Driver	Hypoxia inducible lipid droplet associated	30962421
HIF1A	Driver	Hypoxia inducible factor 1 subunit alpha	30962421
ALOX12	Driver	Arachidonate 12-lipoxygenase, 12S type	30962574
ACSL4	Driver	Acyl-CoA synthetase long chain family member 4	30962574
HMOX1	Driver	Heme oxygenase 1	31036877
IFNG	Driver	Interferon gamma	31043744
ANO6	Driver	Anoctamin 6	31060306
LPIN1	Driver	Lipin 1	31061954
HMGB1	Driver	High mobility group box 1	31105999
TNFAIP3	Driver	TNF alpha induced protein 3	31160087
TLR4	Driver	Toll like receptor 4	31196626
NOX4	Driver	NADPH oxidase 4	31196626
ATF3	Driver	Activating transcription factor 3	31273299
ATM	Driver	ATM serine/threonine kinase	31320750
YY1AP1	Driver	YY1 associated protein 1	31341276
EGLN2	Driver	Egl-9 family hypoxia inducible factor 2	31355331
MIOX	Driver	Myo-inositol oxygenase	31437128
TAZ	Driver	Tafazzin	31484063
MTDH	Driver	Metadherin	31527591
IDH1	Driver	Isocitrate dehydrogenase (NADP(+)) 1	31591388
SIRT1	Driver	Sirtuin 1	31610175
TAZ	Driver	Tafazzin	31641008
BECN1	Driver	Beclin 1	31650158
FBXW7	Driver	F-box and WD repeat domain containing 7	31679460
PANX1	Driver	Pannexin 1	31694915
DNAJB6	Driver	DnaJ heat shock protein family (Hsp40) member B6	31701262
BACH1	Driver	BTB domain and CNC homolog 1	31740582
ACSL4	Driver	Acyl-CoA synthetase long chain family member 4	31789401
LONP1	Driver	Lon peptidase 1, mitochondrial	31822343
SLC7A11	Suppressor	Solute carrier family 7 member 11	22632970
GPX4	Suppressor	Glutathione peroxidase 4	24439385
AKR1C1	Suppressor	Aldo-keto reductase family 1 member C1	24844246
AKR1C2	Suppressor	Aldo-keto reductase family 1 member C2	24844246
AKR1C3	Suppressor	Aldo-keto reductase family 1 member C3	24844246
GPX4	Suppressor	Glutathione peroxidase 4	25402683
RB1	Suppressor	RB transcriptional corepressor 1	25444922
HSPB1	Suppressor	Heat shock protein family B (small) member 1	25728673
HSF1	Suppressor	Heat shock transcription factor 1	25728673
SLC7A11	Suppressor	Solute carrier family 7 member 11	25799988
GPX4	Suppressor	Glutathione peroxidase 4	25824823
GCLC	Suppressor	Glutamate-cysteine ligase catalytic subunit	26166707
SLC7A11	Suppressor	Solute carrier family 7 member 11	26218928
NFE2L2	Suppressor	Nuclear factor, erythroid 2 like 2	26403645
SQSTM1	Suppressor	Sequestosome 1	26403645
NQO1	Suppressor	NAD(P)H quinone dehydrogenase 1	26403645
HMOX1	Suppressor	Heme oxygenase 1	26403645
FTH1	Suppressor	Ferritin heavy chain 1	26403645
MUC1	Suppressor	Mucin 1, cell surface associated	26930718
SLC3A2	Suppressor	Solute carrier family 3 member 2	26945935
MT1G	Suppressor	Metallothionein 1G	27015352
NFE2L2	Suppressor	Nuclear factor, erythroid 2 like 2	27015352
SLC40A1	Suppressor	Solute carrier family 40 member 1	27441659
SLC7A11	Suppressor	Solute carrier family 7 member 11	27441659
GPX4	Suppressor	Glutathione peroxidase 4	27441659
SLC7A11	Suppressor	Solute carrier family 7 member 11	27477897
CISD1	Suppressor	CDGSH iron sulfur domain 1	27510639
SLC7A11	Suppressor	Solute carrier family 7 member 11	27705786
FANCD2	Suppressor	FA complementation group D2	27773819
GPX4	Suppressor	Glutathione peroxidase 4	27964880
NFE2L2	Suppressor	Nuclear factor, erythroid 2 like 2	28012440
FTMT	Suppressor	Ferritin mitochondrial	28066232
HSPA5	Suppressor	Heat shock protein family A (Hsp70) member 5	28130223
ATF4	Suppressor	Activating transcription factor 4	28130223
SLC7A11	Suppressor	Solute carrier family 7 member 11	28195347
GPX4	Suppressor	Glutathione peroxidase 4	28212525
GPX4	Suppressor	Glutathione peroxidase 4	28297659
HMOX1	Suppressor	Heme oxygenase 1	28515173
ATF4	Suppressor	Activating transcription factor 4	28553953
NFE2L2	Suppressor	Nuclear factor, erythroid 2 like 2	28805788
TP53	Suppressor	Tumor protein p53	28813679
SLC7A11	Suppressor	Solute carrier family 7 member 11	28813679
HELLS	Suppressor	Helicase, lymphoid specific	28900510
SCD	Suppressor	Stearoyl-CoA desaturase	28900510
FADS2	Suppressor	Fatty acid desaturase 2	28900510
SRC	Suppressor	SRC proto-oncogene, non-receptor tyrosine kinase	28972104
STAT3	Suppressor	Signal transducer and activator of transcription 3	28972104
NFE2L2	Suppressor	Nuclear factor, erythroid 2 like 2	28985506
PML	Suppressor	Promyelocytic leukemia	29081404
MTOR	Suppressor	Mechanistic target of rapamycin kinase	29127238
NFS1	Suppressor	NFS1 cysteine desulfurase	29168506
TP63	Suppressor	Tumor protein p63	29212036
SLC7A11	Suppressor	Solute carrier family 7 member 11	29274359
TP53	Suppressor	Tumor protein p53	29346757
CDKN1A	Suppressor	Cyclin dependent kinase inhibitor 1A	29346757
MIR137	Suppressor	microRNA 137	29348676
SLC40A1	Suppressor	Solute carrier family 40 member 1	29436589
GPX4	Suppressor	Glutathione peroxidase 4	29436589
GPX4	Suppressor	Glutathione peroxidase 4	29463878
ENPP2	Suppressor	Ectonucleotide pyrophosphatase/phosphodiesterase 2	29551679
VDAC2	Suppressor	Voltage dependent anion channel 2	29569437
FH	Suppressor	Fumarate hydratase	29917289
CISD2	Suppressor	CDGSH iron sulfur domain 2	29928961
SLC40A1	Suppressor	Solute carrier family 40 member 1	29949159
MIR9-1	Suppressor	microRNA 9-1	30035324
MIR9-2	Suppressor	microRNA 9-2	30035324
MIR9-3	Suppressor	microRNA 9-3	30035324
CBS	Suppressor	Cystathionine beta-synthase	30258181
NFE2L2	Suppressor	Nuclear factor, erythroid 2 like 2	30339884
SQSTM1	Suppressor	Sequestosome 1	30339884
GPX4	Suppressor	Glutathione peroxidase 4	30524291
ISCU	Suppressor	Iron-sulfur cluster assembly enzyme	30557609
FTH1	Suppressor	Ferritin heavy chain 1	30557609
ACSL3	Suppressor	Acyl-CoA synthetase long chain family member 3	30686757
OTUB1	Suppressor	OTU deubiquitinase, ubiquitin aldehyde binding 1	30709928
CD44	Suppressor	CD44 molecule (Indian blood group)	30709928
LINC00336	Suppressor	Long intergenic non-protein coding RNA 336	30787392
STAT3	Suppressor	Signal transducer and activator of transcription 3	30811078
BRD4	Suppressor	Bromodomain containing 4	30988278
PRDX6	Suppressor	Peroxiredoxin 6	31036877
MIR17	Suppressor	microRNA 17	31160087
SCD	Suppressor	Stearoyl-CoA desaturase	31270077
SESN2	Suppressor	Sestrin 2	31323261
NF2	Suppressor	Neurofibromin 2	31341276
ARNTL	Suppressor	Aryl hydrocarbon receptor nuclear translocator like	31355331
HIF1A	Suppressor	Hypoxia inducible factor 1 subunit alpha	31355331
JUN	Suppressor	Jun proto-oncogene, AP-1 transcription factor subunit	31394193
CA9	Suppressor	Carbonic anhydrase 9	31442913
HSPA5	Suppressor	Heat shock protein family A (Hsp70) member 5	31456633
TMBIM4	Suppressor	Transmembrane BAX inhibitor motif containing 4	31507082
HSPA5	Suppressor	Heat shock protein family A (Hsp70) member 5	31519193
PLIN2	Suppressor	Perilipin 2	31520166
MIR212	Suppressor	microRNA 212	31533781
Fer1HCH	Suppressor	Ferritin 1 Heavy Chain Homolog	31568497
AIFM2	Suppressor	Apoptosis inducing factor mitochondria associated 2	31634899
AIFM2	Suppressor	Apoptosis inducing factor mitochondria associated 2	31634900
LAMP2	Suppressor	Lysosomal associated membrane protein 2	31672277
ZFP36	Suppressor	ZFP36 ring finger protein	31679460
GPX4	Suppressor	Glutathione peroxidase 4	31685805
PROM2	Suppressor	Prominin 2	31735663
CHMP5	Suppressor	Charged multivesicular body protein 5	31761326
CHMP6	Suppressor	Charged multivesicular body protein 6	31761326
AKR1C1	Suppressor	Aldo-keto reductase family 1 member C1	31780644
AKR1C2	Suppressor	Aldo-keto reductase family 1 member C2	31780644
AKR1C3	Suppressor	Aldo-keto reductase family 1 member C3	31780644
CBS	Suppressor	Cystathionine beta-synthase	31819185
NFE2L2	Suppressor	Nuclear factor, erythroid 2 like 2	31819185
CAV1	Suppressor	Caveolin 1	31877357
GCH1	Suppressor	GTP cyclohydrolase 1	31989025
PTGS2	Marker	Prostaglandin-endoperoxide synthase 2	24439385
DUSP1	Marker	Dual specificity phosphatase 1	24439385
NOS2	Marker	Nitric oxide synthase 2	24439385
NCF2	Marker	Neutrophil cytosolic factor 2	24439385
MT3	Marker	Metallothionein 3	24439385
UBC	Marker	Ubiquitin C	24439385
ALB	Marker	Albumin	24439385
TXNRD1	Marker	Thioredoxin reductase 1	24439385
SRXN1	Marker	Sulfiredoxin 1	24439385
GPX2	Marker	Glutathione peroxidase 2	24439385
BNIP3	Marker	BCL2 interacting protein 3	24439385
OXSR1	Marker	Oxidative stress responsive kinase 1	24439385
SELENOS	Marker	Selenoprotein S	24439385
ANGPTL7	Marker	Angiopoietin like 7	24439385
CHAC1	Marker	ChaC glutathione specific gamma-glutamylcyclotransferase 1	24844246
SLC7A11	Marker	Solute carrier family 7 member 11	24844246
DDIT4	Marker	DNA damage inducible transcript 4	24844246
LOC284561	Marker	_NA_	24844246
ASNS	Marker	Asparagine synthetase (glutamine-hydrolyzing)	24844246
TSC22D3	Marker	TSC22 domain family member 3	24844246
DDIT3	Marker	DNA damage inducible transcript 3	24844246
JDP2	Marker	Jun dimerization protein 2	24844246
SESN2	Marker	Sestrin 2	24844246
SLC1A4	Marker	Solute carrier family 1 member 4	24844246
PCK2	Marker	Phosphoenolpyruvate carboxykinase 2, mitochondrial	24844246
TXNIP	Marker	Thioredoxin interacting protein	24844246
VLDLR	Marker	Very low density lipoprotein receptor	24844246
GPT2	Marker	Glutamic--pyruvic transaminase 2	24844246
PSAT1	Marker	Phosphoserine aminotransferase 1	24844246
LURAP1L	Marker	Leucine rich adaptor protein 1 like	24844246
SLC7A5	Marker	Solute carrier family 7 member 5	24844246
HERPUD1	Marker	Homocysteine inducible ER protein with ubiquitin like domain 1	24844246
XBP1	Marker	X-box binding protein 1	24844246
ATF3	Marker	Activating transcription factor 3	24844246
SLC3A2	Marker	Solute carrier family 3 member 2	24844246
CBS	Marker	Cystathionine beta-synthase	24844246
ATF4	Marker	Activating transcription factor 4	24844246
ZNF419	Marker	Zinc finger protein 419	24844246
KLHL24	Marker	Kelch like family member 24	24844246
TRIB3	Marker	Tribbles pseudokinase 3	24844246
ZFP69B	Marker	ZFP69 zinc finger protein B	24844246
ATP6V1G2	Marker	ATPase H+ transporting V1 subunit G2	24844246
VEGFA	Marker	Vascular endothelial growth factor A	24844246
GDF15	Marker	Growth differentiation factor 15	24844246
TUBE1	Marker	Tubulin epsilon 1	24844246
ARRDC3	Marker	Arrestin domain containing 3	24844246
CEBPG	Marker	CCAAT enhancer binding protein gamma	24844246
SNORA16A	Marker	Small nucleolar RNA, H/ACA box 16A	24844246
RGS4	Marker	Regulator of G protein signaling 4	24844246
BLOC1S5-TXNDC5	Marker	BLOC1S5-TXNDC5 readthrough (NMD candidate)	24844246
LOC390705	Marker	_NA_	24844246
EIF2S1	Marker	Eukaryotic translation initiation factor 2 subunit 1	24844246
KIM-1	Marker	Kidney injury molecule-1	25385600
IL6	Marker	Interleukin 6	25385600
CXCL2	Marker	C-X-C motif chemokine ligand 2	25385600
RELA	Marker	RELA proto-oncogene, NF-kB subunit	25385600
HSD17B11	Marker	Hydroxysteroid 17-beta dehydrogenase 11	25965523
AGPAT3	Marker	1-acylglycerol-3-phosphate O-acyltransferase 3	25965523
SETD1B	Marker	SET domain containing 1B, histone lysine methyltransferase	25965523
HMOX1	Marker	Heme oxygenase 1	26097885
TF	Marker	Transferrin	26097885
FTL	Marker	Ferritin light chain	26097885
RPL8	Marker	Ribosomal protein L8	26097885
ATP5MC3	Marker	ATP synthase membrane subunit c locus 3	26097885
TFRC	Marker	Transferrin receptor	26097885
MAFG	Marker	MAF bZIP transcription factor G	26403645
IL33	Marker	Interleukin 33	27352622
FTH1	Marker	Ferritin heavy chain 1	27514700
SLC40A1	Marker	Solute carrier family 40 member 1	27773819
TF	Marker	Transferrin	27773819
TFRC	Marker	Transferrin receptor	27773819
FTH1	Marker	Ferritin heavy chain 1	27773819
GPX4	Marker	Glutathione peroxidase 4	27773819
HAMP	Marker	Hepcidin antimicrobial peptide	27773819
HSPB1	Marker	Heat shock protein family B (small) member 1	27773819
NFE2L2	Marker	Nuclear factor, erythroid 2 like 2	27773819
STEAP3	Marker	STEAP3 metalloreductase	27773819
DRD5	Marker	Dopamine receptor D5	27793671
GPX4	Marker	Glutathione peroxidase 4	27793671
DRD4	Marker	Dopamine receptor D4	27793671
MAP3K5	Marker	Mitogen-activated protein kinase kinase kinase 5	28887319
MAPK14	Marker	Mitogen-activated protein kinase 14	28887319
SLC2A1	Marker	Solute carrier family 2 member 1	28900510
SLC2A3	Marker	Solute carrier family 2 member 3	28900510
SLC2A6	Marker	Solute carrier family 2 member 6	28900511
SLC2A8	Marker	Solute carrier family 2 member 8	28900512
SLC2A12	Marker	Solute carrier family 2 member 12	28900513
GLUT13	Marker	_NA_	28900514
SLC2A14	Marker	Solute carrier family 2 member 14	28900515
EIF2AK4	Marker	Eukaryotic translation initiation factor 2 alpha kinase 4	29383104
EIF2S1	Marker	Eukaryotic translation initiation factor 2 subunit alpha	29383104
ATF4	Marker	Activating transcription factor 4	29383104
ALOX5	Marker	Arachidonate 5-lipoxygenase	29632885
ALOX12	Marker	Arachidonate 12-lipoxygenase, 12S type	29632885
ALOX15	Marker	Arachidonate 15-lipoxygenase	29632885
ALOX5	Marker	Arachidonate 5-lipoxygenase	30294906
ACSF2	Marker	Acyl-CoA synthetase family member 2	30539824
IREB2	Marker	Iron responsive element binding protein 2	30539824
GPX4	Marker	Glutathione peroxidase 4	30539824
HMGB1	Marker	High mobility group box 1	30686534
HMOX1	Marker	Heme oxygenase 1	30692261
NFE2L2	Marker	Nuclear factor, erythroid 2 like 2	30692261
ELAVL1	Marker	ELAV like RNA binding protein 1	30787392
SLC3A2	Marker	Solute carrier family 3 member 2	31043744
SLC7A11	Marker	Solute carrier family 7 member 11	31043744
TFAP2C	Marker	Transcription factor AP-2 gamma	31056284
SP1	Marker	Sp1 transcription factor	31056284
HBA1	Marker	Hemoglobin subunit alpha 1	31108460
NNMT	Marker	Nicotinamide N-methyltransferase	31108460
PLIN4	Marker	Perilipin 4	31108460
HIC1	Marker	HIC ZBTB transcriptional repressor 1	31108460
STMN1	Marker	Stathmin 1	31108460
RRM2	Marker	Ribonucleotide reductase regulatory subunit M2	31108460
CAPG	Marker	Capping actin protein, gelsolin like	31108460
HNF4A	Marker	Hepatocyte nuclear factor 4 alpha	31108460
NGB	Marker	Neuroglobin	31405213
YWHAE	Marker	Tyrosine 3-monooxygenase/tryptophan 5-monooxygenase activation protein epsilon	31581313
GABPB1	Marker	GA binding protein transcription factor subunit beta 1	31700067
AURKA	Marker	Aurora kinase A	31740746
MIR4715	Marker	microRNA 4715	31740746
RIPK1	Marker	Receptor interacting serine/threonine kinase 1	31827280
PRDX1	Marker	Peroxiredoxin 1	31901729
MIR30B	Marker	microRNA 30b	31926626

## Sheet: Table S2
Table S2. Differentially expressed FEGs between cancer and normal samples in HNSCC.
gene	baseMean	log2FoldChange	lfcSE	stat	pvalue	padj	Regulated
AKR1C1	10104.4	1.93304	0.342985	-5.63592	1.74122e-08	5.92498e-08	Up-regulated
AKR1C2	10079.9	1.54176	0.324812	-4.74661	2.06857e-06	5.068e-06	Up-regulated
AKR1C3	5980.75	1.92015	0.31908	-6.01776	1.76847e-09	6.98832e-09	Up-regulated
ALB	16.0621	2.57128	0.411089	-6.25481	3.97995e-10	1.80572e-09	Up-regulated
ALOX12	828.435	-2.64354	0.281253	9.39915	5.50075e-21	7.92755e-20	Down-regulated
ALOX15	342.116	-2.70795	0.425641	6.36206	1.99069e-10	1.01608e-09	Down-regulated
ALOX15B	1299.26	-1.09715	0.310303	3.53574	0.00040663	0.000772282	Down-regulated
ANGPTL7	42.4764	-3.35457	0.387454	8.65799	4.80174e-18	4.90178e-17	Down-regulated
AURKA	1726.32	1.70551	0.114308	-14.9203	2.43358e-50	1.98742e-48	Up-regulated
CA9	2007.63	5.86092	0.298204	-19.6541	5.33621e-86	1.30737e-83	Up-regulated
CAV1	20981.7	1.72924	0.203575	-8.49435	1.99047e-17	1.87564e-16	Up-regulated
CBS	25.8539	1.76378	0.277798	-6.34916	2.165e-10	1.0825e-09	Up-regulated
CDKN2A	2689.08	3.34632	0.348583	-9.59978	8.01145e-22	1.22675e-20	Up-regulated
CDO1	70.2204	-1.88419	0.311405	6.0506	1.44307e-09	5.99241e-09	Down-regulated
CXCL2	418.275	-1.28691	0.253713	5.07231	3.93008e-07	1.03534e-06	Down-regulated
DDIT3	1022.75	1.04727	0.173724	-6.02839	1.65604e-09	6.76216e-09	Up-regulated
DRD4	45.4688	1.44957	0.238948	-6.06646	1.30761e-09	5.52351e-09	Up-regulated
DRD5	15.1038	3.05822	0.373597	-8.18589	2.70296e-16	2.13621e-15	Up-regulated
DUOX1	7763.13	-1.25698	0.166071	7.56894	3.76275e-14	2.63393e-13	Down-regulated
DUOX2	3451.3	-1.03856	0.286747	3.62187	0.000292478	0.000570569	Down-regulated
DUSP1	19089.1	-1.42527	0.181473	7.8539	4.03311e-15	2.90621e-14	Down-regulated
EGFR	26008.8	1.06778	0.199257	-5.35884	8.37582e-08	2.44295e-07	Up-regulated
GOT1	3400.14	-1.37252	0.100019	13.7226	7.43595e-43	3.64362e-41	Down-regulated
GPT2	3259.73	-1.76626	0.146977	12.0173	2.88304e-33	1.00906e-31	Down-regulated
HBA1	4.28866	-1.2781	0.354572	3.60462	0.000312612	0.000603071	Down-regulated
HELLS	1160.63	1.13649	0.13636	-8.33453	7.7805e-17	7.06009e-16	Up-regulated
HNF4A	12.8556	1.77061	0.325421	-5.44099	5.29846e-08	1.64319e-07	Up-regulated
IFNG	40.3356	1.84357	0.312793	-5.89388	3.7722e-09	1.37939e-08	Up-regulated
IL33	1002.28	-1.7795	0.298267	5.96613	2.42951e-09	9.30048e-09	Down-regulated
IL6	734.218	-1.6016	0.294903	5.43095	5.60561e-08	1.69552e-07	Down-regulated
LINC00336	3.74983	1.86752	0.412329	-4.5292	5.92073e-06	1.31871e-05	Up-regulated
LINC00472	12.8687	-1.82589	0.272469	6.70126	2.06633e-11	1.17733e-10	Down-regulated
LPIN1	1364.83	-1.79389	0.127325	14.089	4.43574e-45	2.71689e-43	Down-regulated
MIOX	32.6282	4.53024	0.439892	-10.2985	7.15612e-25	1.25232e-23	Up-regulated
MT3	26.5234	-2.25103	0.420752	5.35002	8.7944e-08	2.53486e-07	Down-regulated
MUC1	4382.33	-1.20821	0.243074	4.97054	6.67674e-07	1.7219e-06	Down-regulated
NCF2	1777.66	1.13227	0.137983	-8.20585	2.28965e-16	1.86988e-15	Up-regulated
NGB	74.8866	4.22732	0.466643	-9.05899	1.31658e-19	1.40245e-18	Up-regulated
NOX4	286.416	1.76313	0.190311	-9.26449	1.96006e-20	2.52744e-19	Up-regulated
NOX5	73.8826	1.43171	0.250784	-5.70892	1.13696e-08	4.03702e-08	Up-regulated
PGD	15080	-1.04331	0.164634	6.33719	2.33991e-10	1.14656e-09	Down-regulated
PLIN2	1435.16	-1.12655	0.187039	6.0231	1.7111e-09	6.87244e-09	Down-regulated
PLIN4	626.749	-4.49405	0.285377	15.7477	7.11787e-56	8.71939e-54	Down-regulated
PRKAA2	378.761	-2.93191	0.323414	9.06549	1.24043e-19	1.38138e-18	Down-regulated
PTGS2	2848.09	1.55485	0.284118	-5.47254	4.43623e-08	1.39343e-07	Up-regulated
RGS4	488.885	2.51181	0.239807	-10.4743	1.13396e-25	2.52565e-24	Up-regulated
RRM2	5195.43	1.03957	0.125049	-8.31334	9.30462e-17	8.14154e-16	Up-regulated
SLC2A1	59036.7	1.71356	0.161584	-10.6048	2.83204e-26	6.9385e-25	Up-regulated
SLC2A14	15.4758	1.99241	0.334489	-5.95657	2.57582e-09	9.70886e-09	Up-regulated
SLC2A6	507.841	2.05185	0.167201	-12.2717	1.28505e-34	5.24727e-33	Up-regulated
SLC7A11	2633.14	1.54963	0.280491	-5.52471	3.30037e-08	1.06393e-07	Up-regulated
SLC7A5	35939.4	1.05329	0.170706	-6.17019	6.82066e-10	2.93169e-09	Up-regulated
SOCS1	689.587	1.77514	0.171443	-10.3541	4.00899e-25	8.06337e-24	Up-regulated
STMN1	10505.8	1.22489	0.134267	-9.12281	7.31985e-20	8.53983e-19	Up-regulated
TF	844.276	-3.45842	0.368372	9.38839	6.09261e-21	8.29272e-20	Down-regulated
TFR2	134.385	1.24712	0.225843	-5.52208	3.35006e-08	1.06593e-07	Up-regulated
TFRC	14375	1.30506	0.162098	-8.05105	8.2084e-16	6.09412e-15	Up-regulated
TRIB3	1686.17	1.1518	0.169712	-6.7868	1.14651e-11	6.85112e-11	Up-regulated
VEGFA	7634.55	1.00204	0.146245	-6.85177	7.29412e-12	4.5822e-11	Up-regulated
ZFP36	18101.6	-1.58236	0.157685	10.0349	1.07061e-23	1.74867e-22	Down-regulated

## Sheet: Table S3
Table S3. FElncRNs are correlated with DE-FEGs in HNSCC.
DE-FEGs	FElncRNA	Rho	P.value
MIOX	AC074389.2	0.39	1.05e-19
IFNG	AC007991.2	0.367	1.98e-17
DDIT3	LINC02428	0.306	2.27e-12
CDKN2A	AC073896.4	0.375	3.09e-18
SOCS1	AC073896.4	0.385	3.52e-19
STMN1	AC073896.4	0.401	7.95e-21
CDKN2A	EP300-AS1	0.364	3.36e-17
HELLS	EP300-AS1	0.48	2.95e-30
HELLS	AL021707.8	0.305	2.82e-12
DDIT3	AL021707.8	0.336	1.03e-14
STMN1	AL021707.8	0.386	2.89e-19
SOCS1	LINC02195	0.306	2.33e-12
IFNG	LINC02195	0.641	1.86e-59
TRIB3	AC009403.1	0.344	2.37e-15
ALOX12	U91328.1	0.323	1.24e-13
LPIN1	U91328.1	0.312	8.77e-13
HELLS	U91328.1	0.304	3.45e-12
CBS	U91328.1	0.311	1.01e-12
TFR2	AC005920.4	0.305	3.08e-12
TFRC	LINC00519	0.319	2.67e-13
CA9	AC100801.1	0.313	7.58e-13
CDKN2A	LINC01006	0.418	1.07e-22
SOCS1	LINC01006	0.337	7.79e-15
HELLS	LINC01006	0.493	4.46e-32
CBS	LINC01006	0.449	2.86e-26
CAV1	LINC01006	-0.308	1.64e-12
SLC7A5	LINC01006	-0.325	8.21e-14
STMN1	LINC01006	0.587	7.5e-48
CAV1	CEBPA-DT	-0.317	3.67e-13
IFNG	LINC01871	0.741	1.12e-88
MIOX	AC106875.1	0.454	7.8e-27
NGB	AC106875.1	0.37	9.11e-18
SOCS1	LINC01569	0.348	9.03e-16
CDKN2A	AC010969.2	0.331	2.67e-14
SOCS1	AC010969.2	0.345	1.84e-15
STMN1	AC010969.2	0.384	4.82e-19
TFR2	PROSER2-AS1	0.369	1.19e-17
CBS	PROSER2-AS1	0.319	2.55e-13
STMN1	AC135178.5	0.305	2.98e-12
LPIN1	AC139795.2	0.42	7.62e-23
HELLS	AC139795.2	0.558	2.42e-42
CBS	AC139795.2	0.344	1.98e-15
CAV1	AC139795.2	-0.307	2.06e-12
STMN1	AC139795.2	0.363	4.06e-17
STMN1	MHENCR	0.356	1.83e-16
PRKAA2	AC021087.3	0.608	4.45e-52
PLIN4	AC021087.3	0.697	3.85e-74
NGB	LINC01644	0.301	5.77e-12
SOCS1	AL161669.3	0.322	1.44e-13
LPIN1	AL161669.3	0.434	2.04e-24
HELLS	AL355574.1	0.304	3.4e-12
SOCS1	AL354836.1	0.325	8.22e-14
MIOX	AL354836.1	0.33	3.33e-14
TFRC	AC073046.1	0.31	1.2e-12
SLC2A1	SLC9A3-AS1	0.424	2.47e-23
SOCS1	AC046143.2	0.321	1.6e-13
DDIT3	AC046143.2	0.314	6.02e-13
CDKN2A	AC090425.1	0.401	7.36e-21
SOCS1	AC090425.1	0.413	4.35e-22
HELLS	AC090425.1	0.387	2.43e-19
STMN1	AC090425.1	0.495	1.9e-32
DUOX1	AC083841.1	0.474	1.56e-29
IFNG	AL359076.1	0.343	2.78e-15
LPIN1	AL359076.1	0.306	2.55e-12
HELLS	AL359076.1	0.392	6.39e-20
SOCS1	AC008610.1	0.324	1.05e-13
STMN1	AC008610.1	0.421	5.87e-23
SOCS1	PXN-AS1	0.31	1.22e-12
HELLS	PXN-AS1	0.315	5.35e-13
CBS	PXN-AS1	0.314	5.64e-13
STMN1	PXN-AS1	0.5	4.67e-33
STMN1	BX284668.5	0.344	1.97e-15
TFR2	AC006329.1	0.361	6.47e-17
CDKN2A	AC005840.4	0.34	5.15e-15
SOCS1	AC005840.4	0.406	2.42e-21
IFNG	AC005840.4	0.332	2.1e-14
HELLS	AC005840.4	0.342	3.36e-15
CDKN2A	RAB11B-AS1	0.428	9.58e-24
STMN1	RAB11B-AS1	0.321	1.83e-13
HELLS	AL606834.2	0.301	5.27e-12
TFR2	AC006449.6	0.353	3.91e-16
CDKN2A	AC006449.6	0.318	2.95e-13
LPIN1	AC006449.6	0.301	5.7e-12
MIOX	AC006449.6	0.428	8.57e-24
HELLS	AC006449.6	0.429	7.65e-24
CBS	AC006449.6	0.353	3.63e-16
CAV1	AC006449.6	-0.381	8.83e-19
MT3	AC006449.6	0.33	3.54e-14
DRD4	AC006449.6	0.352	4.75e-16
STMN1	AC006449.6	0.486	3.56e-31
SOCS1	LINC01475	0.375	3.13e-18
HELLS	LINC01475	0.493	3.95e-32
STMN1	LINC01475	0.318	2.97e-13
SOCS1	AC008105.3	0.312	8.17e-13
IFNG	AC008105.3	0.41	8.29e-22
NOX4	MIR100HG	0.457	2.96e-27
RGS4	MIR100HG	0.38	1.07e-18
CDO1	AC092916.1	0.322	1.33e-13
MIOX	AC092916.1	0.446	6.44e-26
STMN1	AC010531.6	0.328	5.03e-14
MIOX	ELF3-AS1	0.338	7.13e-15
MUC1	ELF3-AS1	0.361	7.38e-17
CAV1	ELF3-AS1	-0.368	1.58e-17
CAV1	LHX1-DT	0.474	1.57e-29
MIOX	LINC01770	0.489	1.72e-31
MUC1	LINC01770	0.35	6.76e-16
MT3	LINC01770	0.349	8.65e-16
NGB	LINC01770	0.348	1e-15
CDKN2A	DBH-AS1	0.325	8.89e-14
SOCS1	DBH-AS1	0.388	1.84e-19
IFNG	DBH-AS1	0.541	2.01e-39
STMN1	DBH-AS1	0.319	2.28e-13
SOCS1	AC147651.3	0.305	2.74e-12
IFNG	AC147651.3	0.326	7.16e-14
SLC2A6	AC147651.3	0.378	1.8e-18
DUSP1	AC025259.3	0.326	7.25e-14
SLC2A6	AC060766.4	0.389	1.46e-19
CDO1	AC022706.1	0.329	3.58e-14
IFNG	AC022706.1	0.338	6.93e-15
MIOX	AC022706.1	0.345	1.78e-15
MT3	AC022706.1	0.321	1.56e-13
TFR2	THAP9-AS1	0.328	4.73e-14
CDKN2A	THAP9-AS1	0.363	4.12e-17
HELLS	THAP9-AS1	0.451	1.42e-26
CBS	THAP9-AS1	0.339	5.43e-15
STMN1	THAP9-AS1	0.479	3.94e-30
RRM2	THAP9-AS1	0.304	3.64e-12
CXCL2	AC022784.1	0.31	1.19e-12
SOCS1	AC083964.1	0.474	1.93e-29
CDKN2A	AC106900.2	0.342	3.13e-15
TFR2	LMO7-AS1	0.321	1.83e-13
MIOX	LMO7-AS1	0.397	1.93e-20
CDKN2A	AC097468.3	0.325	7.94e-14
SOCS1	AC097468.3	0.334	1.56e-14
STMN1	AC097468.3	0.339	6.02e-15
TFRC	FEZF1-AS1	0.313	7.61e-13
CBS	AL031985.3	0.323	1.11e-13
STMN1	AL031985.3	0.309	1.46e-12
DUOX1	AC115522.1	0.515	2.42e-35
CDKN2A	AC009065.5	0.351	5.54e-16
CDKN2A	AL049874.3	0.395	3.04e-20
HELLS	AL049874.3	0.441	2.41e-25
CBS	AL049874.3	0.321	1.74e-13
STMN1	AL049874.3	0.383	6.12e-19
CDKN2A	FAM111A-DT	0.308	1.81e-12
SOCS1	FAM111A-DT	0.305	2.85e-12
HELLS	FAM111A-DT	0.481	1.82e-30
CBS	FAM111A-DT	0.326	7.05e-14
STMN1	FAM111A-DT	0.447	4.51e-26
LPIN1	SNHG21	0.306	2.43e-12
HELLS	SNHG21	0.337	9.06e-15
CBS	SNHG21	0.33	3.26e-14
STMN1	SNHG21	0.348	9.33e-16
HELLS	LINC00342	0.407	1.83e-21
STMN1	LINC00342	0.386	2.49e-19
LPIN1	LENG8-AS1	0.349	8.62e-16
HELLS	LENG8-AS1	0.407	1.74e-21
STMN1	LENG8-AS1	0.302	5.16e-12
LPIN1	LINC00173	0.346	1.49e-15
HELLS	LINC00173	0.404	3.83e-21
DUOX1	AC005392.2	0.437	7.42e-25
HELLS	AL158212.3	0.484	6.63e-31
SLC7A11	LINC00942	0.461	1.02e-27
CDO1	AL158166.1	0.632	1.95e-57
MT3	AL158166.1	0.488	2.16e-31
CDKN2A	LINC01578	0.323	1.26e-13
DDIT3	LINC01578	0.456	3.45e-27
STMN1	LINC01578	0.348	1e-15
SOCS1	AC010980.2	0.34	4.6e-15
MIOX	AC010980.2	0.361	7.35e-17
PRKAA2	LINC00702	0.758	7.05e-95
PLIN4	LINC00702	0.655	7.56e-63
MIOX	AP005482.1	0.35	6.68e-16
DRD4	AP005482.1	0.315	5.46e-13
LPIN1	PSMA3-AS1	0.329	4.09e-14
HELLS	PSMA3-AS1	0.538	5.92e-39
STMN1	PSMA3-AS1	0.457	2.53e-27
NGB	AC120498.4	0.309	1.55e-12
SOCS1	ZNF213-AS1	0.346	1.53e-15
DRD4	ZNF213-AS1	0.379	1.51e-18
STMN1	ZNF213-AS1	0.363	4.12e-17
DDIT3	GS1-124K5.4	0.319	2.66e-13
TRIB3	GS1-124K5.4	0.346	1.56e-15
CDO1	LINC02178	0.478	5.32e-30
MT3	LINC02178	0.447	5.3e-26
HELLS	AP002807.1	0.305	2.73e-12
STMN1	AP002807.1	0.307	1.91e-12
SOCS1	AL035071.1	0.452	1.35e-26
STMN1	AL035071.1	0.335	1.23e-14
STMN1	AL391069.2	0.31	1.13e-12
TFRC	AC112484.3	0.369	1.34e-17
STMN1	AC112484.3	0.314	5.72e-13
NOX4	SERTAD4-AS1	0.399	1.23e-20
STMN1	AL590705.3	0.33	2.97e-14
IFNG	HCP5	0.35	7.01e-16
LPIN1	AC005332.3	0.341	3.67e-15
HELLS	AC005332.3	0.427	1.12e-23
CBS	AC005332.3	0.35	6.37e-16
STMN1	AC005332.3	0.5	4.34e-33
HELLS	AC078864.1	0.332	2.07e-14
LPIN1	LINC00393	0.307	2.22e-12
HELLS	AC004918.1	0.31	1.14e-12
STMN1	AC004918.1	0.368	1.38e-17
HELLS	Z69706.1	0.393	4.98e-20
STMN1	Z69706.1	0.336	1.11e-14
SOCS1	AC096711.1	0.38	1.15e-18
SOCS1	OSER1-DT	0.333	1.87e-14
HELLS	OSER1-DT	0.375	3.4e-18
CBS	OSER1-DT	0.392	6.21e-20
STMN1	OSER1-DT	0.586	1.14e-47
DDIT3	AL355353.1	0.303	3.78e-12
CDKN2A	TNRC6C-AS1	0.363	4.79e-17
SOCS1	TNRC6C-AS1	0.511	8.96e-35
LPIN1	TNRC6C-AS1	0.321	1.7e-13
HELLS	TNRC6C-AS1	0.443	1.47e-25
SLC7A5	TNRC6C-AS1	-0.331	2.88e-14
STMN1	TNRC6C-AS1	0.392	7.7e-20
LPIN1	AL354892.2	0.418	1.07e-22
HELLS	AL354892.2	0.486	3.7e-31
CBS	AL354892.2	0.435	1.51e-24
CAV1	AL354892.2	-0.389	1.25e-19
STMN1	AL354892.2	0.463	4.6e-28
MIOX	AC092171.3	0.346	1.58e-15
LPIN1	AL132989.1	0.347	1.14e-15
HELLS	AL132989.1	0.393	5.7e-20
MIOX	AC034206.1	0.326	7.45e-14
STMN1	AC008946.1	0.378	1.73e-18
SOCS1	AC009065.8	0.363	4.68e-17
HELLS	AC009065.8	0.395	3.74e-20
CBS	AC009065.8	0.339	5.79e-15
STMN1	AC009065.8	0.434	1.61e-24
DUOX1	AL138916.1	0.311	9.38e-13
MUC1	AL022067.1	0.642	9.79e-60
TFRC	WNT5A-AS1	0.354	3.07e-16
SLC7A11	WNT5A-AS1	0.583	4.89e-47
IFNG	LINC02084	0.484	9e-31
TFRC	AC125257.1	0.326	6.44e-14
TFR2	AC125257.1	0.303	3.9e-12
LPIN1	AC125257.1	0.327	5.78e-14
HELLS	AC125257.1	0.494	2.64e-32
CBS	AC125257.1	0.393	5.11e-20
STMN1	AC125257.1	0.396	2.72e-20
IFNG	CARD8-AS1	0.353	3.62e-16
HELLS	AC062037.2	0.302	4.59e-12
CDKN2A	ZNF667-AS1	0.408	1.42e-21
SOCS1	ZNF667-AS1	0.352	4.25e-16
HELLS	ZNF667-AS1	0.448	3.66e-26
CBS	ZNF667-AS1	0.337	9.07e-15
STMN1	ZNF667-AS1	0.401	7.47e-21
DDIT3	ZFAS1	0.325	7.62e-14
TRIB3	ZFAS1	0.325	8.85e-14
STMN1	ZFAS1	0.326	6.37e-14
SLC7A11	MSC-AS1	0.421	5.73e-23
DUOX1	TRAM2-AS1	-0.301	5.41e-12
LPIN1	TRAM2-AS1	0.374	4.59e-18
CDKN2A	AC010542.5	0.328	4.98e-14
SOCS1	AC010542.5	0.306	2.43e-12
HELLS	AC010542.5	0.339	5.85e-15
DRD4	AC010542.5	0.311	1.06e-12
STMN1	AC010542.5	0.521	3.02e-36
CDKN2A	LINC00963	0.325	8.84e-14
HELLS	LINC00963	0.322	1.34e-13
CBS	LINC00963	0.302	5.2e-12
STMN1	LINC00963	0.325	8.32e-14
LPIN1	AC108010.1	0.325	8.53e-14
ALOX12	ASH1L-AS1	0.318	2.72e-13
SLC2A1	AC073569.2	0.387	2.09e-19
NCF2	LINC02345	0.324	9.84e-14
CAV1	HS1BP3-IT1	0.447	5.49e-26
PTGS2	HS1BP3-IT1	0.307	2.12e-12
SLC7A5	HS1BP3-IT1	0.368	1.42e-17
STMN1	AL162274.2	0.318	3.17e-13
NGB	AL355601.1	0.469	7.63e-29
DRD4	AP001029.1	0.346	1.61e-15
DDIT3	MIR200CHG	0.385	3.54e-19
HELLS	AC121757.1	0.369	1.33e-17
LPIN1	AC012368.1	0.32	2.07e-13
DUOX1	MAFG-DT	-0.324	1.01e-13
SOCS1	MAFG-DT	0.337	7.8e-15
CBS	MAFG-DT	0.344	2.23e-15
DRD4	MAFG-DT	0.309	1.36e-12
STMN1	MAFG-DT	0.346	1.46e-15
HELLS	AC022509.1	0.307	2.04e-12
DUOX1	AC129492.1	0.312	8.54e-13
SOCS1	AC127024.5	0.365	2.82e-17
LPIN1	AC127024.5	0.358	1.18e-16
MIOX	AC127024.5	0.311	1.01e-12
HELLS	AC127024.5	0.455	5.64e-27
CBS	AC127024.5	0.321	1.67e-13
DRD4	AC127024.5	0.301	5.24e-12
STMN1	AC127024.5	0.447	5.6e-26
SLC7A5	VPS9D1-AS1	0.321	1.83e-13
STMN1	FAM27C	0.367	1.93e-17
CDKN2A	AL355488.1	0.381	8.66e-19
SOCS1	AL355488.1	0.405	3.09e-21
LPIN1	AL355488.1	0.371	8.05e-18
HELLS	AL355488.1	0.64	3.19e-59
CBS	AL355488.1	0.447	4.39e-26
STMN1	AL355488.1	0.616	1.09e-53
DDIT3	SNHG5	0.321	1.63e-13
DRD4	AC104793.1	0.329	3.74e-14
LPIN1	AL031186.1	0.334	1.64e-14
HELLS	AL031186.1	0.363	4.8e-17
CBS	AL031186.1	0.307	1.89e-12
STMN1	AL031186.1	0.329	4.21e-14
LPIN1	AC015849.3	0.396	2.72e-20
HELLS	AC015849.3	0.458	1.86e-27
NOX5	LINC01210	0.33	2.96e-14
MUC1	SLCO4A1-AS1	0.405	3.15e-21
NOX4	MEG3	0.304	3.14e-12
DUOX1	AC021078.1	0.324	1.05e-13
PRKAA2	AC053503.4	0.605	2.41e-51
PLIN4	AC053503.4	0.749	1.57e-91
DUOX1	AL033384.1	0.34	5.11e-15
LPIN1	AC007249.1	0.376	2.85e-18
CBS	LINC02054	0.37	9.09e-18
SOCS1	AL355803.1	0.303	3.79e-12
MIOX	AL355803.1	0.377	2.27e-18
SOCS1	TTTY14	0.371	7.52e-18
STMN1	TTTY14	0.442	2.05e-25
LPIN1	ARHGAP27P1-BPTFP1-KPNA2P3	0.303	4e-12
IFNG	U62317.2	0.382	7.55e-19
STMN1	LINC02562	0.354	3.08e-16
CDO1	FGF14-AS2	0.371	8.56e-18
HELLS	FGF14-AS2	0.333	1.7e-14
CBS	FGF14-AS2	0.358	1.33e-16
MT3	FGF14-AS2	0.302	4.43e-12
STMN1	FGF14-AS2	0.386	2.65e-19
SOCS1	LINC01089	0.442	1.96e-25
HELLS	LINC01089	0.365	2.83e-17
CBS	LINC01089	0.33	2.95e-14
DRD4	LINC01089	0.371	8.64e-18
STMN1	LINC01089	0.496	1.34e-32
MIOX	NDUFV2-AS1	0.365	3.06e-17
DRD4	NDUFV2-AS1	0.355	2.19e-16
TFR2	AC007342.4	0.317	3.41e-13
CDKN2A	ASB16-AS1	0.36	7.6e-17
SOCS1	ASB16-AS1	0.379	1.36e-18
LPIN1	ASB16-AS1	0.367	1.86e-17
HELLS	ASB16-AS1	0.545	3.69e-40
CBS	ASB16-AS1	0.358	1.38e-16
CAV1	ASB16-AS1	-0.316	4.5e-13
STMN1	ASB16-AS1	0.53	9.26e-38
NOX4	AL136084.3	0.343	2.45e-15
MIOX	AC128709.1	0.465	2.38e-28
SLC7A11	LINC01508	0.393	5.72e-20
DUOX1	LINC02560	0.434	1.59e-24
GPT2	LINC02560	0.347	1.25e-15
ALOX15	AL121790.2	0.356	1.91e-16
DDIT3	SNHG8	0.404	3.57e-21
PRKAA2	MYHAS	0.76	8.31e-96
PLIN4	MYHAS	0.814	2.92e-120
MT3	MINCR	0.319	2.29e-13
STMN1	MINCR	0.374	4.1e-18
LPIN1	AC026471.4	0.406	2.61e-21
HELLS	AC026471.4	0.362	5.25e-17
CAV1	AC026471.4	-0.35	6.82e-16
SLC7A11	AP003119.3	0.352	4.4e-16
CDKN2A	LINC01451	0.332	2.19e-14
MIOX	LINC01451	0.332	2.12e-14
MT3	LINC01451	0.358	1.19e-16
STMN1	LINC01451	0.323	1.12e-13
SLC2A6	VIM-AS1	0.414	3.37e-22
STMN1	VIM-AS1	0.323	1.12e-13
CDKN2A	H1FX-AS1	0.301	5.75e-12
SOCS1	H1FX-AS1	0.435	1.2e-24
MT3	H1FX-AS1	0.305	3.04e-12
STMN1	H1FX-AS1	0.481	2.09e-30
LPIN1	AC084018.1	0.42	7.54e-23
HELLS	AC084018.1	0.489	1.58e-31
CBS	AC084018.1	0.322	1.44e-13
STMN1	AC084018.1	0.329	3.59e-14
DUOX1	LINC01559	0.317	3.71e-13
HELLS	EIF3J-DT	0.494	2.63e-32
CBS	EIF3J-DT	0.395	3.59e-20
STMN1	EIF3J-DT	0.449	2.85e-26
CAV1	LINC00958	0.308	1.83e-12
CDKN2A	AC104794.2	0.468	1.07e-28
SOCS1	AC104794.2	0.399	1.22e-20
LPIN1	AC104794.2	0.408	1.43e-21
HELLS	AC104794.2	0.629	1.21e-56
CBS	AC104794.2	0.414	3.38e-22
CAV1	AC104794.2	-0.354	3.11e-16
SLC7A5	AC104794.2	-0.343	2.78e-15
STMN1	AC104794.2	0.551	2.85e-41
TFRC	OIP5-AS1	0.348	9.79e-16
LPIN1	OIP5-AS1	0.406	2.13e-21
HELLS	OIP5-AS1	0.519	5.13e-36
CBS	OIP5-AS1	0.332	2.19e-14
SOCS1	AL390778.2	0.349	8.68e-16
HELLS	AL390778.2	0.406	2.2e-21
PRKAA2	ZNF710-AS1	0.469	7.73e-29
LPIN1	ZNF710-AS1	0.32	2.16e-13
HELLS	ZNF710-AS1	0.355	2.35e-16
PLIN4	ZNF710-AS1	0.584	2.81e-47
SOCS1	LINC01896	0.316	4.08e-13
SOCS1	AL022328.1	0.345	1.87e-15
LPIN1	AL022328.1	0.365	3.08e-17
HELLS	AL022328.1	0.385	3.18e-19
STMN1	AL022328.1	0.356	2.04e-16
DRD4	TOLLIP-AS1	0.317	3.76e-13
STMN1	TOLLIP-AS1	0.302	4.61e-12
MUC1	AC106897.1	0.463	4.33e-28
CDO1	LINC01413	0.555	6.91e-42
MT3	LINC01413	0.458	1.9e-27
CDO1	LINC00992	0.302	5.05e-12
CDKN2A	AC078778.1	0.354	2.66e-16
SOCS1	AC078778.1	0.418	1.33e-22
HELLS	AC078778.1	0.473	2.35e-29
CBS	AC078778.1	0.307	1.93e-12
STMN1	AC078778.1	0.576	1.12e-45
SLC7A11	AP003119.1	0.427	1.31e-23
SOCS1	LINC01341	0.35	6.02e-16
LPIN1	LINC01341	0.36	7.56e-17
MIOX	LINC01341	0.442	1.8e-25
CDKN2A	AC010503.4	0.423	2.91e-23
HELLS	AC010503.4	0.312	8.49e-13
CAV1	AC010503.4	-0.372	6.02e-18
DDIT3	AC010503.4	0.315	5.24e-13
STMN1	AC010503.4	0.386	2.63e-19
DUOX1	AC009779.2	-0.372	6.88e-18
LPIN1	AC009779.2	0.38	1.07e-18
HELLS	AC009779.2	0.402	5.82e-21
CBS	AC009779.2	0.334	1.58e-14
DDIT3	AC009779.2	0.309	1.36e-12
STMN1	AC009779.2	0.359	9.33e-17
SOCS1	AC011374.2	0.324	1.04e-13
CDKN2A	LINC01389	0.3	6.5e-12
HELLS	LINC01389	0.31	1.12e-12
STMN1	LINC01389	0.329	3.75e-14
RRM2	LINC01389	0.301	5.36e-12
SOCS1	PCAT19	0.429	7.34e-24
MIOX	PCAT19	0.323	1.19e-13
HELLS	BLACAT1	0.347	1.19e-15
ALOX15	AC111149.2	0.315	4.62e-13
CDKN2A	LINC02446	0.349	7.99e-16
IFNG	LINC02446	0.767	3.01e-98
HELLS	EPB41L4A-AS1	0.301	5.43e-12
MT3	EPB41L4A-AS1	0.303	3.79e-12
DRD4	EPB41L4A-AS1	0.317	3.38e-13
STMN1	EPB41L4A-AS1	0.441	2.4e-25
MIOX	AL021392.1	0.352	4.41e-16
HELLS	AL513165.1	0.356	1.93e-16
STMN1	AL513165.1	0.34	5.14e-15
CDO1	AL139042.1	0.33	3.14e-14
CDKN2A	POLR2J4	0.367	1.86e-17
HELLS	POLR2J4	0.33	3.16e-14
STMN1	POLR2J4	0.325	7.53e-14
MIOX	AC010789.1	0.398	1.88e-20
SOCS1	AC011450.1	0.307	2.2e-12
HELLS	AC011450.1	0.393	5.11e-20
CBS	AC011450.1	0.341	3.96e-15
STMN1	AC011450.1	0.409	1.05e-21
TFRC	AC036214.2	0.365	2.78e-17
CDO1	LINC00867	0.653	2.87e-62
MT3	LINC00867	0.568	3.09e-44
HELLS	CNNM3-DT	0.362	5.44e-17
STMN1	CNNM3-DT	0.318	2.77e-13
TFRC	AC019080.1	0.388	1.93e-19
CXCL2	AC245128.3	0.318	2.84e-13
TFRC	UBL7-AS1	0.416	1.91e-22
HELLS	UBL7-AS1	0.554	1.09e-41
CBS	UBL7-AS1	0.351	4.93e-16
STMN1	UBL7-AS1	0.43	5.38e-24
RRM2	UBL7-AS1	0.464	3.31e-28
HELLS	AL391001.1	0.476	9.6e-30
CBS	AL391001.1	0.461	8.78e-28
STMN1	AL391001.1	0.491	8.54e-32
LPIN1	AC007406.5	0.315	5.27e-13
HELLS	AC007406.5	0.49	1.01e-31
TFRC	TMEM44-AS1	0.394	4.08e-20
STMN1	TMEM44-AS1	0.334	1.63e-14
MIOX	AL390719.2	0.31	1.26e-12
HELLS	AL390719.2	0.315	4.64e-13
DRD4	AL390719.2	0.344	2.34e-15
STMN1	AL390719.2	0.422	4.55e-23
CDO1	CHL1-AS2	0.634	7.77e-58
MT3	CHL1-AS2	0.555	6.83e-42
LPIN1	AL365330.1	0.335	1.35e-14
HELLS	AL365330.1	0.356	1.8e-16
STMN1	AL365330.1	0.341	4.28e-15
CDKN2A	AL022316.1	0.303	3.99e-12
SOCS1	AL022316.1	0.349	8.52e-16
HELLS	AL022316.1	0.337	8.19e-15
STMN1	AL022316.1	0.305	2.9e-12
CDKN2A	LINC01679	0.368	1.52e-17
STMN1	AL359513.1	0.325	7.86e-14
HELLS	AC104825.1	0.328	4.52e-14
CAV1	AC104825.1	-0.321	1.74e-13
STMN1	AC104825.1	0.385	3.36e-19
HELLS	LINC02057	0.364	3.58e-17
TFRC	AL109976.1	0.34	4.64e-15
LPIN1	AL109976.1	0.336	9.45e-15
HELLS	AL109976.1	0.302	5.16e-12
TFR2	RHPN1-AS1	0.332	2.18e-14
HELLS	RHPN1-AS1	0.307	1.97e-12
CBS	RHPN1-AS1	0.328	4.56e-14
STMN1	RHPN1-AS1	0.316	4.38e-13
CDO1	AP000593.3	0.395	3.14e-20
MT3	AP000593.3	0.342	3.2e-15
TFRC	AC022075.1	0.321	1.77e-13
SOCS1	LMF1-AS1	0.357	1.64e-16
DDIT3	SNHG7	0.334	1.4e-14
DRD4	SNHG7	0.316	4.57e-13
SOCS1	LINC02091	0.452	1.3e-26
HELLS	LINC02091	0.355	2.23e-16
CBS	PIK3CD-AS2	0.322	1.54e-13
SOCS1	AC010883.1	0.398	1.86e-20
DRD4	AC010883.1	0.365	3.17e-17
STMN1	AC010883.1	0.397	2.22e-20
TFRC	LINC01703	0.303	3.81e-12
TFR2	AC016877.3	0.33	3.33e-14
CDKN2A	AC016877.3	0.312	8.25e-13
MIOX	AC016877.3	0.336	1.09e-14
HELLS	AC016877.3	0.44	3.98e-25
CBS	AC016877.3	0.413	4e-22
STMN1	AC016877.3	0.505	6.66e-34
HELLS	LINC00511	0.32	1.98e-13
HELLS	AC099850.3	0.306	2.39e-12
CAV1	AC099850.3	0.465	2.51e-28
RRM2	AC099850.3	0.483	1.01e-30
AURKA	AC099850.3	0.559	1.49e-42
CDKN2A	LINC01305	0.332	2.28e-14
HELLS	LINC01305	0.496	1.37e-32
CBS	LINC01305	0.396	3e-20
STMN1	LINC01305	0.376	2.74e-18
CDO1	LINC02525	0.325	8.65e-14
MIOX	LINC02525	0.496	1.67e-32
MT3	LINC02525	0.352	4.21e-16
DRD4	LINC02525	0.307	2.17e-12
SOCS1	AC096677.1	0.334	1.39e-14
LPIN1	AC096677.1	0.387	2.25e-19
HELLS	AC096677.1	0.444	1.15e-25
CBS	AC096677.1	0.315	4.76e-13
CAV1	AC096677.1	-0.311	1.03e-12
STMN1	AC096677.1	0.378	1.72e-18
TFR2	LINC00957	0.321	1.81e-13
CBS	LINC00957	0.32	1.91e-13
STMN1	LINC00957	0.333	1.82e-14
CDO1	AF279873.3	0.48	2.62e-30
MT3	AF279873.3	0.363	4.46e-17
SOCS1	AP000254.1	0.433	2.39e-24
HELLS	AP000254.1	0.408	1.41e-21
CBS	AP000254.1	0.313	6.87e-13
DRD4	AP000254.1	0.301	5.67e-12
STMN1	AP000254.1	0.489	1.59e-31
CDO1	ST8SIA6-AS1	0.378	1.66e-18
MUC1	ST8SIA6-AS1	0.448	3.6e-26
MT3	ST8SIA6-AS1	0.376	2.52e-18
MIOX	LINC02031	0.35	7.09e-16
ALOX15	AL590666.2	0.305	2.81e-12
SOCS1	AC110285.2	0.316	4.17e-13
MIOX	AC110285.2	0.34	4.43e-15
CBS	AC110285.2	0.343	2.53e-15
STMN1	AC110285.2	0.391	8.87e-20
CBS	AC010719.1	0.32	1.98e-13
STMN1	AC010719.1	0.448	4.02e-26
STMN1	DICER1-AS1	0.368	1.52e-17
MIOX	AC126768.1	0.32	1.88e-13
SOCS1	AL023803.1	0.307	1.94e-12
STMN1	AL023803.1	0.359	9.54e-17
NOX4	AL139393.2	0.364	3.53e-17
TFRC	SOX21-AS1	0.332	2.18e-14
ALOX15	SOX21-AS1	0.305	2.67e-12
HELLS	SOX21-AS1	0.381	8.92e-19
CAV1	SOX21-AS1	-0.351	5.67e-16
DUOX1	AC084033.3	-0.364	3.44e-17
MUC1	AC084033.3	0.315	4.89e-13
DDIT3	AC084033.3	0.327	5.45e-14
SLC2A6	AC084033.3	0.314	6.38e-13
STMN1	AC084033.3	0.399	1.42e-20
TFR2	AC079414.3	0.373	4.72e-18
CDKN2A	AC079414.3	0.393	5.49e-20
MIOX	AC079414.3	0.358	1.39e-16
HELLS	AC079414.3	0.529	1.52e-37
CBS	AC079414.3	0.384	4.64e-19
STMN1	AC079414.3	0.549	7.24e-41
LPIN1	MIR193BHG	-0.367	1.8e-17
HELLS	MIR193BHG	-0.361	7.46e-17
RGS4	AC090204.1	0.301	5.63e-12
NOX4	AL357992.1	0.321	1.72e-13
LPIN1	AL022328.2	0.389	1.31e-19
HELLS	AL022328.2	0.378	1.55e-18
STMN1	AL022328.2	0.337	8.96e-15
SOCS1	AC106795.2	0.422	3.75e-23
CDO1	AC106795.2	0.327	5.22e-14
MIOX	AC106795.2	0.416	1.91e-22
MT3	AC106795.2	0.533	2.92e-38
STMN1	AC106795.2	0.355	2.29e-16
SOCS1	AC004148.2	0.339	6.26e-15
LPIN1	AC004148.2	0.353	3.22e-16
MIOX	AC004148.2	0.344	2.3e-15
HELLS	AC004148.2	0.426	1.35e-23
CBS	AC004148.2	0.316	3.84e-13
STMN1	AC004148.2	0.43	5.2e-24
CDKN2A	AL136295.7	0.347	1.17e-15
SOCS1	AL136295.7	0.304	3.35e-12
HELLS	AL136295.7	0.383	5.24e-19
STMN1	AL136295.7	0.426	1.7e-23
CDKN2A	C5orf56	0.393	5.65e-20
SOCS1	C5orf56	0.5	3.65e-33
IFNG	C5orf56	0.56	7.91e-43
HELLS	C5orf56	0.331	2.76e-14
STMN1	C5orf56	0.359	1.12e-16
HELLS	THUMPD3-AS1	0.479	3.84e-30
CBS	THUMPD3-AS1	0.356	1.98e-16
STMN1	THUMPD3-AS1	0.534	2.27e-38
HELLS	AL513550.1	0.307	2.06e-12
CBS	AL513550.1	0.315	5.1e-13
CDO1	SEMA3B-AS1	0.516	1.8e-35
MT3	SEMA3B-AS1	0.459	1.42e-27
HELLS	AC005726.3	0.311	1.06e-12
DRD4	AC005726.3	0.358	1.4e-16
STMN1	AC005726.3	0.364	3.59e-17
MIOX	AC092384.2	0.377	2.08e-18
NGB	AC092384.2	0.317	3.56e-13
TFRC	AC145207.8	0.389	1.25e-19
LPIN1	AC145207.8	0.332	2.19e-14
SLC7A11	AC145207.8	0.486	3.61e-31
DUOX1	AL049840.2	0.305	2.65e-12
DDIT3	AL049840.2	-0.346	1.52e-15
CDKN2A	DNAJC9-AS1	0.357	1.6e-16
HELLS	DNAJC9-AS1	0.478	4.91e-30
CBS	DNAJC9-AS1	0.31	1.3e-12
STMN1	DNAJC9-AS1	0.6	1.97e-50
TFR2	AC124798.1	0.338	6.69e-15
MIOX	AC124798.1	0.32	2.23e-13
HELLS	AC124798.1	0.373	4.97e-18
CBS	AC124798.1	0.436	1.02e-24
STMN1	AC124798.1	0.382	6.76e-19
STMN1	SNHG11	0.361	6.98e-17
CAV1	AC245041.2	0.345	1.82e-15
MIOX	LINC01169	0.342	3.23e-15
LPIN1	AL035587.1	0.399	1.47e-20
HELLS	AL035587.1	0.521	3.25e-36
STMN1	AL035587.1	0.358	1.15e-16
STMN1	AL354920.1	0.328	5.01e-14
SLC2A6	AC018755.4	0.36	7.94e-17
HELLS	AC004943.2	0.429	7.64e-24
STMN1	AC004943.2	0.306	2.33e-12
RRM2	AC004943.2	0.383	5.64e-19
AURKA	AC004943.2	0.35	6.1e-16
TFR2	AC096992.2	0.325	8.4e-14
CDKN2A	AC096992.2	0.333	1.85e-14
SOCS1	AC096992.2	0.309	1.43e-12
LPIN1	AC096992.2	0.332	2.02e-14
MIOX	AC096992.2	0.379	1.44e-18
HELLS	AC096992.2	0.544	5e-40
CBS	AC096992.2	0.38	1.18e-18
CAV1	AC096992.2	-0.313	7.11e-13
DRD4	AC096992.2	0.305	2.75e-12
STMN1	AC096992.2	0.448	3.67e-26
LPIN1	AC012485.2	0.329	3.62e-14
ALOX12	DSG1-AS1	0.304	3.33e-12
MIOX	LINC02570	0.311	1.05e-12
PRKAA2	AC068506.1	0.867	3.86e-153
PLIN4	AC068506.1	0.631	3.87e-57
CDKN2A	AC024060.1	0.35	6.77e-16
SOCS1	AC024060.1	0.434	1.95e-24
HELLS	AC024060.1	0.447	5.36e-26
CBS	AC024060.1	0.38	1.04e-18
MT3	AC024060.1	0.342	3.07e-15
STMN1	AC024060.1	0.61	1.52e-52
VEGFA	AC084117.1	0.407	2.11e-21
LPIN1	AC060780.1	0.439	5.01e-25
HELLS	AC060780.1	0.546	2.31e-40
CBS	AC060780.1	0.384	4.37e-19
STMN1	AC060780.1	0.397	2.23e-20
DDIT3	AP003352.1	0.311	1.08e-12
STMN1	AP003352.1	0.322	1.35e-13
SLC7A11	AC026785.3	0.387	2.19e-19
LPIN1	AC098851.1	0.312	9.12e-13
HELLS	AC098851.1	0.379	1.22e-18
IFNG	LINC01857	0.337	7.76e-15
SOCS1	TMEM161B-AS1	0.407	1.85e-21
HELLS	TMEM161B-AS1	0.417	1.5e-22
CBS	TMEM161B-AS1	0.311	9.36e-13
MT3	TMEM161B-AS1	0.389	1.31e-19
STMN1	TMEM161B-AS1	0.528	2.54e-37
GPT2	AC016888.1	0.339	5.4e-15
NOX4	NKILA	0.324	9.09e-14
DUOX1	AL357033.3	0.308	1.8e-12
SOCS1	RPARP-AS1	0.31	1.12e-12
MIOX	RPARP-AS1	0.351	4.95e-16
HELLS	RPARP-AS1	0.456	3.74e-27
CBS	RPARP-AS1	0.341	4.16e-15
CAV1	RPARP-AS1	-0.33	3.37e-14
DRD4	RPARP-AS1	0.314	6.16e-13
STMN1	RPARP-AS1	0.536	1.2e-38
LPIN1	AC008124.1	0.307	2.1e-12
HELLS	AC008124.1	0.441	2.48e-25
CBS	AC008124.1	0.323	1.21e-13
CAV1	AC008124.1	-0.373	4.94e-18
STMN1	AC008124.1	0.368	1.4e-17
MIOX	AC016642.1	0.387	2.16e-19
MT3	AC016642.1	0.322	1.46e-13
TFRC	TM4SF1-AS1	0.343	2.47e-15
DDIT3	LINC01023	0.326	6.45e-14
TFRC	OLMALINC	0.324	9.02e-14
LPIN1	OLMALINC	0.385	3.64e-19
HELLS	OLMALINC	0.567	5.84e-44
CBS	OLMALINC	0.502	1.98e-33
CAV1	OLMALINC	-0.308	1.86e-12
STMN1	OLMALINC	0.503	1.78e-33
NOX4	LINC01050	0.451	1.43e-26
CAV1	MANCR	0.397	2.06e-20
TFRC	AF131216.3	0.338	6.5e-15
CDKN2A	AC093627.4	0.316	4.53e-13
HELLS	AC093627.4	0.311	1.03e-12
STMN1	AC093627.4	0.355	2.51e-16
STMN1	AC012213.4	0.318	2.81e-13
HELLS	JPX	0.41	8.82e-22
CBS	JPX	0.329	3.72e-14
DDIT3	JPX	0.316	4.49e-13
STMN1	JPX	0.41	9.95e-22
HELLS	MIR3142HG	0.353	3.28e-16
SLC2A6	MIR3142HG	0.318	2.82e-13
STMN1	MIR3142HG	0.313	7.35e-13
CDKN2A	AC092718.4	0.456	3.37e-27
HELLS	AC092718.4	0.377	1.92e-18
STMN1	AC092718.4	0.482	1.47e-30
RRM2	AC092718.4	0.381	7.97e-19
AURKA	AC092718.4	0.353	3.33e-16
DDIT3	AC015912.3	0.326	6.27e-14
SOCS1	GLIS3-AS1	0.302	4.58e-12
VEGFA	AL360181.2	0.368	1.57e-17
HELLS	AC115618.2	0.389	1.31e-19
SOCS1	AC012510.1	0.3	6.32e-12
SOCS1	AC008115.3	0.332	2.1e-14
LPIN1	AC008115.3	0.413	4.13e-22
HELLS	AC008115.3	0.54	2.68e-39
STMN1	AC008115.3	0.37	9.47e-18
HELLS	NRSN2-AS1	0.3	6.59e-12
TRIB3	NRSN2-AS1	0.346	1.36e-15
VEGFA	IER3-AS1	0.309	1.33e-12
CXCL2	IER3-AS1	0.457	2.7e-27
MIOX	ADIRF-AS1	0.308	1.68e-12
DDIT3	RTCA-AS1	0.358	1.29e-16
STMN1	RTCA-AS1	0.33	3.51e-14
SOCS1	AC135050.6	0.356	1.97e-16
HELLS	AC135050.6	0.328	5.05e-14
CAV1	AC135050.6	-0.319	2.59e-13
DRD4	AC135050.6	0.301	5.72e-12
STMN1	AC135050.6	0.347	1.27e-15
MIOX	DLGAP1-AS1	0.395	3.68e-20
HELLS	C1RL-AS1	0.301	5.23e-12
MIOX	AC021744.1	0.317	3.84e-13
STMN1	AC009065.4	0.367	2.04e-17
NOX4	LINC01711	0.375	3.07e-18
SOCS1	AC005261.3	0.312	8.49e-13
STMN1	AC005261.3	0.365	2.78e-17
MIOX	LINC02580	0.368	1.4e-17
CDO1	AC011840.1	0.508	2.76e-34
MIOX	AC011840.1	0.302	4.69e-12
MT3	AC011840.1	0.463	4.35e-28
CDO1	AL121904.1	0.657	2.7e-63
MT3	AL121904.1	0.562	4.36e-43
DUOX1	GSEC	-0.376	2.55e-18
SLC2A6	GSEC	0.333	1.78e-14
HELLS	LINC01547	0.308	1.86e-12
STMN1	LINC01547	0.383	6.07e-19
SOCS1	AP005482.3	0.359	1.13e-16
MIOX	AP005482.3	0.374	4.36e-18
HELLS	AP005482.3	0.4	1.05e-20
DRD4	AP005482.3	0.309	1.51e-12
STMN1	AP005482.3	0.404	4.05e-21
CDKN2A	AL035461.2	0.396	2.64e-20
SOCS1	AL035461.2	0.483	9.42e-31
HELLS	AL035461.2	0.414	2.92e-22
STMN1	AL035461.2	0.587	9.91e-48
HELLS	AC108449.2	0.378	1.88e-18
CDO1	HOXA11-AS	0.385	3.89e-19
MT3	HOXA11-AS	0.337	8.83e-15
DUOX1	CERS3-AS1	0.361	7.28e-17
LPIN1	AC074117.1	0.358	1.2e-16
CDO1	LINC02163	0.396	2.92e-20
MT3	LINC02163	0.329	4.04e-14
HELLS	AL050341.2	0.326	6.25e-14
STMN1	AL050341.2	0.393	5.08e-20
LPIN1	AC011477.3	0.358	1.32e-16
HELLS	AC011477.3	0.404	3.82e-21
STMN1	AC011477.3	0.332	2.14e-14
NOX4	SMIM25	0.326	6.51e-14
NCF2	SMIM25	0.407	2.03e-21
MIOX	BOLA3-AS1	0.374	3.92e-18
PRKAA2	MIR1-1HG	0.654	1.11e-62
PLIN4	MIR1-1HG	0.788	2.68e-107
CDKN2A	C5orf66-AS1	0.417	1.55e-22
MUC1	C5orf66-AS1	0.367	1.99e-17
STMN1	C5orf66-AS1	0.412	5.88e-22
MIOX	LINC00667	0.314	6.35e-13
HELLS	LINC00667	0.3	6.71e-12
DRD4	LINC00667	0.323	1.19e-13
PTGS2	AC034223.1	0.327	5.95e-14
STMN1	AL031665.2	0.333	1.71e-14
SLC2A6	LINC00623	0.353	3.39e-16
TFRC	SAMD12-AS1	0.443	1.56e-25
SLC7A11	SAMD12-AS1	0.318	3.04e-13
DDIT3	SAMD12-AS1	0.348	9.26e-16
TRIB3	SAMD12-AS1	0.334	1.58e-14
TFRC	MIR600HG	0.355	2.33e-16
LPIN1	MIR600HG	0.406	2.53e-21
HELLS	MIR600HG	0.539	3.88e-39
CBS	MIR600HG	0.401	9.02e-21
CAV1	MIR600HG	-0.345	1.71e-15
STMN1	MIR600HG	0.429	6.76e-24
HELLS	AC102953.2	0.405	3.34e-21
HELLS	SBF2-AS1	0.376	2.5e-18
CBS	AC091271.1	0.301	5.63e-12
STMN1	AC091271.1	0.327	5.23e-14
CDKN2A	AL021807.1	0.446	7.48e-26
HELLS	AL021807.1	0.38	1.1e-18
STMN1	AL021807.1	0.447	4.38e-26
RRM2	AL021807.1	0.333	1.87e-14
SOCS1	AC004687.1	0.321	1.86e-13
IFNG	AC004687.1	0.437	7.71e-25
STMN1	AC004687.1	0.315	5.02e-13
SOCS1	COLCA1	0.359	9.74e-17
HELLS	COLCA1	0.429	6.57e-24
DUSP1	COLCA1	0.306	2.54e-12
GPT2	LINC02012	0.345	1.92e-15
STMN1	LINC02012	0.329	3.88e-14
MIOX	AC108134.3	0.488	2.35e-31
HELLS	AC063948.1	0.396	2.66e-20
CBS	AC063948.1	0.442	1.93e-25
STMN1	AC063948.1	0.473	2.11e-29
CDKN2A	AC026401.3	0.304	3.55e-12
SOCS1	AC026401.3	0.399	1.36e-20
STMN1	AC026401.3	0.334	1.49e-14
CDO1	AL445250.1	0.445	8.18e-26
MT3	AL445250.1	0.351	5.32e-16
SOCS1	Z97200.1	0.361	7.14e-17
SOCS1	AC108868.2	0.372	5.81e-18
DRD4	AP000924.1	0.391	9.81e-20
CXCL2	AC004817.3	0.421	5.12e-23
SOCS1	AC048341.2	0.311	9.62e-13
HELLS	AC048341.2	0.375	3.25e-18
STMN1	AC048341.2	0.411	7.39e-22
STMN1	HMGA1P4	0.303	3.74e-12
STMN1	AL451085.2	0.303	3.99e-12
CDKN2A	AF131215.5	0.319	2.4e-13
LPIN1	AF131215.5	0.353	3.75e-16
HELLS	AF131215.5	0.565	1.28e-43
MIOX	AC147651.2	0.328	4.91e-14
DUOX1	LINC02001	-0.303	4.06e-12
DDIT3	LINC02001	0.305	3.04e-12
STMN1	LINC02001	0.407	1.92e-21
SOCS1	AC120053.1	0.394	4.57e-20
HELLS	AC120053.1	0.343	2.89e-15
DRD4	AC120053.1	0.317	3.52e-13
STMN1	AC120053.1	0.456	4.38e-27
PRKAA2	AC015878.1	0.795	1.39e-110
PLIN4	AC015878.1	0.787	8.48e-107
DUOX1	AC138207.5	0.372	5.85e-18
DUOX1	AL355312.3	0.318	2.72e-13
DUOX1	LINC00339	-0.334	1.45e-14
SOCS1	LINC00339	0.301	5.26e-12
HELLS	LINC00339	0.402	6.05e-21
CBS	LINC00339	0.327	5.37e-14
SLC7A5	LINC00339	-0.308	1.82e-12
DRD4	LINC00339	0.325	7.49e-14
STMN1	LINC00339	0.543	7.74e-40
STMN1	AC099518.6	0.327	5.25e-14
MIOX	AC080037.1	0.391	8.46e-20
CDO1	FAM242A	0.649	2.75e-61
MT3	FAM242A	0.561	5.1e-43
CDKN2A	AL031673.1	0.351	5.21e-16
HELLS	AL031673.1	0.506	5.8e-34
STMN1	AL031673.1	0.515	2.61e-35
CAV1	LINC02081	0.388	1.81e-19
SOCS1	AF001548.2	0.303	4.12e-12
HELLS	AF001548.2	0.312	8.95e-13
MIOX	LINC01133	0.322	1.45e-13
DDIT3	LINC01133	0.321	1.85e-13
STMN1	LINC01133	0.304	3.42e-12
DUOX1	AC024597.1	0.302	4.64e-12
STMN1	LINC01094	-0.303	3.72e-12
CDO1	LINC00540	0.497	1.29e-32
MT3	LINC00540	0.361	6.64e-17
HELLS	AC009948.1	0.336	9.43e-15
CDKN2A	DTX2P1-UPK3BP1-PMS2P11	0.34	4.39e-15
SOCS1	DTX2P1-UPK3BP1-PMS2P11	0.351	5.27e-16
LPIN1	DTX2P1-UPK3BP1-PMS2P11	0.356	1.83e-16
HELLS	DTX2P1-UPK3BP1-PMS2P11	0.476	8.57e-30
CBS	DTX2P1-UPK3BP1-PMS2P11	0.323	1.27e-13
CAV1	DTX2P1-UPK3BP1-PMS2P11	-0.34	4.66e-15
STMN1	DTX2P1-UPK3BP1-PMS2P11	0.338	7.1e-15
TFRC	AP003390.1	0.307	1.92e-12
LPIN1	KIRREL3-AS1	0.334	1.6e-14
HELLS	HM13-IT1	0.304	3.15e-12
MUC1	FOXP4-AS1	0.501	3.2e-33
DRD4	FOXP4-AS1	0.312	8.03e-13
PRKAA2	AL450326.1	0.409	1.12e-21
LPIN1	AL450326.1	0.345	1.66e-15
PLIN4	AL450326.1	0.351	4.85e-16
CBS	AL117332.1	0.302	5.01e-12
DRD4	AL117332.1	0.313	7.16e-13
STMN1	AL117332.1	0.456	3.51e-27
MIOX	AL157373.2	0.361	7.24e-17
MT3	AL157373.2	0.318	2.89e-13
TF	SSTR5-AS1	0.412	5.65e-22
CAV1	LNCAROD	0.321	1.74e-13
CDKN2A	AC084824.5	0.322	1.37e-13
SOCS1	AC084824.5	0.458	2.15e-27
HELLS	AC084824.5	0.398	1.63e-20
STMN1	AC084824.5	0.463	4.8e-28
HELLS	AL928654.2	0.334	1.65e-14
DUOX1	AL139385.1	0.372	6.95e-18
GPT2	AL139385.1	0.388	1.57e-19
SOCS1	AC009283.1	0.318	2.91e-13
DDIT3	AC009283.1	0.329	3.68e-14
LPIN1	AC124283.2	0.32	1.91e-13
HELLS	AC124283.2	0.44	3.82e-25
CBS	AC124283.2	0.308	1.66e-12
STMN1	AC124283.2	0.376	2.92e-18
MIOX	LINC01820	0.414	3.03e-22
DDIT3	CH17-340M24.3	0.344	2.38e-15
STMN1	CH17-340M24.3	0.32	2.17e-13
IFNG	HLA-DQB1-AS1	0.468	1.16e-28
MUC1	AC004233.3	0.443	1.49e-25
HELLS	U47924.2	0.325	8.12e-14
DRD4	U47924.2	0.336	1.07e-14
SOCS1	AC034213.1	0.307	2.12e-12
DDIT3	AC034213.1	0.379	1.48e-18
TFRC	AC009506.1	0.332	2.13e-14
HELLS	AC009506.1	0.335	1.13e-14
CBS	AC009506.1	0.333	1.74e-14
CAV1	AC009506.1	-0.371	7.18e-18
STMN1	AC009506.1	0.331	2.49e-14
SOCS1	AC145207.5	0.334	1.43e-14
HELLS	AC145207.5	0.579	2.86e-46
CBS	AC145207.5	0.342	2.98e-15
STMN1	AC145207.5	0.469	8.94e-29
DUOX1	MAPKAPK5-AS1	-0.42	7.82e-23
MIOX	MAPKAPK5-AS1	0.33	3.45e-14
DDIT3	MAPKAPK5-AS1	0.484	8.8e-31
TRIB3	MAPKAPK5-AS1	0.336	1.12e-14
STMN1	MAPKAPK5-AS1	0.442	2.16e-25
CDKN2A	AC009065.2	0.312	8.59e-13
MUC1	AL844908.2	0.366	2.18e-17
HELLS	AC006305.1	0.306	2.46e-12
STMN1	AC006305.1	0.325	8.24e-14
CDKN2A	C2orf48	0.341	3.62e-15
LPIN1	C2orf48	0.343	2.47e-15
HELLS	C2orf48	0.5	3.63e-33
STMN1	C2orf48	0.442	2.22e-25
RRM2	C2orf48	0.371	8.84e-18
VEGFA	AC104695.3	0.315	5.23e-13
CDKN2A	AC091057.1	0.37	1.04e-17
HELLS	AC091057.1	0.702	1.13e-75
CBS	AC091057.1	0.365	2.8e-17
STMN1	AC091057.1	0.536	1.19e-38
RRM2	AC091057.1	0.586	1.18e-47
AURKA	AC091057.1	0.441	3e-25
CDKN2A	SPINT1-AS1	0.304	3.47e-12
MIOX	SPINT1-AS1	0.311	1.09e-12
CAV1	SPINT1-AS1	-0.375	3.4e-18
DDIT3	SPINT1-AS1	0.336	1.07e-14
STMN1	SPINT1-AS1	0.381	9.11e-19
CAV1	KMT2E-AS1	-0.319	2.4e-13
DDIT3	KMT2E-AS1	0.412	5.82e-22
STMN1	KMT2E-AS1	0.343	2.78e-15
TFRC	DANCR	0.338	7.53e-15
CBS	DANCR	0.403	5.34e-21
STMN1	DANCR	0.453	9.1e-27
LPIN1	LINC01560	0.315	4.61e-13
HELLS	LINC01560	0.465	2.64e-28
CBS	LINC01560	0.368	1.49e-17
STMN1	LINC01560	0.393	5.41e-20
DUOX1	SNHG6	-0.313	6.59e-13
SOCS1	SNHG6	0.318	2.7e-13
DRD4	SNHG6	0.307	2.03e-12
STMN1	SNHG6	0.517	1.06e-35
MT3	LINC02482	0.302	5.08e-12
GPT2	LINC01348	0.331	2.44e-14
MIOX	AC131097.3	0.474	1.66e-29
MUC1	AC131097.3	0.388	1.66e-19
MT3	AC131097.3	0.389	1.4e-19
NGB	AC131097.3	0.322	1.3e-13
SOCS1	PCED1B-AS1	0.369	1.18e-17
IFNG	PCED1B-AS1	0.582	8.75e-47
HELLS	AC079610.2	0.433	2.13e-24
CBS	AC079610.2	0.309	1.52e-12
STMN1	AC079610.2	0.416	1.84e-22
SOCS1	AC108673.3	0.374	4.22e-18
STMN1	AC108673.3	0.388	1.77e-19
LPIN1	AC009237.14	0.302	4.98e-12
MIOX	MAFA-AS1	0.368	1.61e-17
NGB	MAFA-AS1	0.45	2.44e-26
NOX4	TGFB2-AS1	0.477	7.21e-30
HELLS	SNHG12	0.34	5.05e-15
STMN1	SNHG12	0.446	7.4e-26
SOCS1	AC132192.2	0.384	4.23e-19
HELLS	AC132192.2	0.315	4.75e-13
MT3	AC132192.2	0.321	1.7e-13
DRD4	AC132192.2	0.347	1.25e-15
STMN1	AC132192.2	0.442	2.17e-25
MUC1	AC040977.1	0.319	2.55e-13
SOCS1	PTOV1-AS2	0.364	3.72e-17
LPIN1	PTOV1-AS2	0.351	5.44e-16
HELLS	PTOV1-AS2	0.529	1.82e-37
CBS	PTOV1-AS2	0.307	2.07e-12
STMN1	PTOV1-AS2	0.471	4.96e-29
MIOX	AC015660.2	0.488	2.32e-31
HELLS	AC108860.2	0.413	4.04e-22
CBS	AC108860.2	0.418	1.2e-22
CAV1	AC108860.2	-0.331	2.5e-14
STMN1	AC108860.2	0.475	1.47e-29
DUOX1	AL138724.1	-0.314	6.34e-13
SLC2A6	AL138724.1	0.417	1.59e-22
STMN1	AL138724.1	0.306	2.52e-12
NOX4	BX322234.1	0.302	4.79e-12
STMN1	ZNF674-AS1	0.313	6.58e-13
TFR2	RNASEH1-AS1	0.329	4.03e-14
STMN1	RNASEH1-AS1	0.38	1.15e-18
LPIN1	AL390728.6	0.354	2.99e-16
HELLS	AL390728.6	0.431	4.5e-24
STMN1	AL390728.6	0.442	1.76e-25
SOCS1	AC116914.2	0.313	7.08e-13
IFNG	AC116914.2	0.333	1.75e-14
LPIN1	AC116914.2	0.349	8.51e-16
HELLS	AC116914.2	0.387	2.4e-19
STMN1	AC116914.2	0.314	5.7e-13
SOCS1	B3GALT5-AS1	0.341	4.29e-15
HELLS	B3GALT5-AS1	0.353	3.57e-16
SOCS1	AL139246.3	0.566	6.98e-44
MT3	AL139246.3	0.355	2.36e-16
STMN1	AL139246.3	0.318	3.14e-13
CBS	AL158013.1	0.422	4.51e-23
STMN1	AL158013.1	0.38	1.2e-18
CBS	HAGLROS	0.332	2.28e-14
STMN1	HAGLROS	0.361	7.42e-17
CXCL2	C20orf197	0.319	2.46e-13
SOCS1	AC104699.1	0.383	5.1e-19
IFNG	AC104699.1	0.337	8.84e-15
HELLS	AL160006.1	0.309	1.42e-12
HELLS	AP001574.1	0.363	4.69e-17
CDO1	AC092811.1	0.44	3.54e-25
MIOX	AC092811.1	0.473	2.1e-29
MT3	AC092811.1	0.409	1.17e-21
NGB	AC092811.1	0.35	7e-16
LPIN1	AC012467.2	0.426	1.68e-23
MIOX	AC012467.2	0.3	6.3e-12
HELLS	AC012467.2	0.574	2.72e-45
CBS	AC012467.2	0.345	1.68e-15
CAV1	AC012467.2	-0.335	1.21e-14
STMN1	AC012467.2	0.474	1.64e-29
STMN1	LINC00467	0.325	7.97e-14
IFNG	AC008760.2	0.311	1.05e-12
CXCL2	AC008760.2	0.317	3.83e-13
TFR2	AC007342.5	0.336	1.12e-14
STMN1	AL121601.1	0.362	5.53e-17
TFRC	AL355974.2	0.398	1.68e-20
CAV1	AL161431.1	0.348	1.03e-15
TFRC	LINC00885	0.363	4.32e-17
LPIN1	LINC00885	0.337	9.07e-15
HELLS	LINC00885	0.311	1.05e-12
CDKN2A	AC016405.3	0.36	8.1e-17
SOCS1	AC016405.3	0.373	4.81e-18
SOCS1	AC096711.3	0.362	5.46e-17
CAV1	ITGB1-DT	0.403	5.36e-21
CDO1	AC010307.4	0.424	2.72e-23
MT3	AC010307.4	0.396	2.88e-20
TFRC	AC010280.1	0.407	1.75e-21
HELLS	FOXD2-AS1	0.315	4.87e-13
CBS	FOXD2-AS1	0.324	9.8e-14
STMN1	FOXD2-AS1	0.408	1.43e-21
TFR2	AC008443.3	0.333	1.75e-14
MIOX	AC008443.3	0.404	3.85e-21
HELLS	AC008443.3	0.361	6.3e-17
CBS	AC008443.3	0.309	1.33e-12
CDKN2A	PART1	0.319	2.3e-13
SOCS1	AC100810.1	0.34	4.42e-15
DRD4	AC100810.1	0.315	5.46e-13
STMN1	AC100810.1	0.393	4.93e-20
TFR2	AC004130.1	0.312	8.8e-13
MIOX	AC004130.1	0.344	1.97e-15
DDIT3	LINC01589	0.307	1.97e-12
TRIB3	LINC01589	0.315	4.88e-13
CDKN2A	AC124016.2	0.401	8.89e-21
SOCS1	AC124016.2	0.483	1.02e-30
HELLS	AC124016.2	0.411	7.08e-22
STMN1	AC124016.2	0.532	5.09e-38
MIOX	BOK-AS1	0.394	4.02e-20
LPIN1	AC005332.5	0.361	7.14e-17
HELLS	AC005332.5	0.38	1.02e-18
DRD4	AC005332.5	0.301	6.07e-12
STMN1	AC005332.5	0.406	2.54e-21
SOCS1	AC012615.1	0.367	1.81e-17
MIOX	AC012615.1	0.329	4.03e-14
HELLS	AC012615.1	0.439	5.11e-25
CBS	AC012615.1	0.392	6.48e-20
CAV1	AC012615.1	-0.336	1.08e-14
MT3	AC012615.1	0.305	3.07e-12
STMN1	AC012615.1	0.514	3.63e-35
HELLS	TMPO-AS1	0.45	2.37e-26
CBS	TMPO-AS1	0.518	9.08e-36
STMN1	TMPO-AS1	0.545	3.45e-40
AURKA	TMPO-AS1	0.319	2.25e-13
SLC7A11	AL683887.1	0.305	2.88e-12
DDIT3	SNHG17	0.336	9.86e-15
DDIT3	FLJ46906	0.318	3.18e-13
TRIB3	FLJ46906	0.317	3.64e-13
LPIN1	RUSC1-AS1	0.434	1.72e-24
HELLS	RUSC1-AS1	0.374	4.44e-18
STMN1	RUSC1-AS1	0.302	4.51e-12
TFR2	AC133785.1	0.448	3.88e-26
SOCS1	AL359853.1	0.469	9.34e-29
DUOX1	AC108134.1	0.487	2.55e-31
GPT2	AC108134.1	0.434	1.94e-24
HELLS	TNFRSF10A-AS1	0.321	1.78e-13
MIOX	BACE1-AS	0.301	5.36e-12
STMN1	BACE1-AS	0.309	1.53e-12
STMN1	SNHG10	0.388	1.67e-19
CDO1	AC023300.2	0.651	9.21e-62
MT3	AC023300.2	0.579	2.36e-46
MIOX	AC136475.3	0.34	4.71e-15
DRD4	AC136475.3	0.327	5.46e-14
CAV1	ILF3-DT	-0.325	7.8e-14
DDIT3	ILF3-DT	0.33	3.13e-14
STMN1	ILF3-DT	0.322	1.53e-13
SOCS1	BAIAP2-DT	0.325	8.13e-14
MIOX	BAIAP2-DT	0.325	8.95e-14
CBS	BAIAP2-DT	0.303	3.72e-12
CAV1	MIR31HG	0.358	1.26e-16
TFRC	AL136018.1	0.321	1.83e-13
SLC7A11	AL136018.1	0.414	3.11e-22
CDO1	LINC01405	0.43	5.13e-24
PRKAA2	LINC01405	0.47	6.27e-29
MT3	LINC01405	0.322	1.37e-13
PLIN4	LINC01405	0.629	1.26e-56
CDO1	AC069120.1	0.667	7.58e-66
MT3	AC069120.1	0.569	2.53e-44
HELLS	LINC01018	0.365	2.97e-17
DUOX1	CD27-AS1	-0.324	9.48e-14
MIOX	CD27-AS1	0.319	2.28e-13
HELLS	CD27-AS1	0.364	3.82e-17
CBS	CD27-AS1	0.307	1.92e-12
CAV1	CD27-AS1	-0.303	4.36e-12
DDIT3	CD27-AS1	0.343	2.67e-15
DRD4	CD27-AS1	0.391	8.46e-20
STMN1	CD27-AS1	0.303	3.8e-12
LPIN1	TMEM9B-AS1	0.35	5.98e-16
HELLS	TMEM9B-AS1	0.444	1.26e-25
CAV1	LINC00911	0.408	1.32e-21
CDKN2A	SREBF2-AS1	0.367	2.03e-17
SOCS1	SREBF2-AS1	0.386	2.76e-19
LPIN1	SREBF2-AS1	0.312	8.15e-13
MIOX	SREBF2-AS1	0.323	1.15e-13
HELLS	SREBF2-AS1	0.51	1.16e-34
CBS	SREBF2-AS1	0.39	1.01e-19
CAV1	SREBF2-AS1	-0.306	2.51e-12
STMN1	SREBF2-AS1	0.473	2.11e-29
CDO1	AL109615.3	0.336	9.92e-15
MT3	AL109615.3	0.377	2.09e-18
MIOX	AC105118.1	0.318	2.9e-13
NGB	AC105118.1	0.385	3.27e-19
CDKN2A	AC017100.1	0.322	1.47e-13
SOCS1	AC017100.1	0.355	2.27e-16
HELLS	AC017100.1	0.448	4.23e-26
CBS	AC017100.1	0.395	3.43e-20
STMN1	AC017100.1	0.329	3.82e-14
DDIT3	ZSCAN16-AS1	0.326	6.57e-14
RGS4	SENCR	0.311	9.65e-13
SLC2A6	SENCR	0.376	2.42e-18
HELLS	AL391121.1	0.434	1.74e-24
SOCS1	HOXC-AS1	0.312	8.65e-13
TF	AC080013.6	0.36	8.21e-17
DRD4	NAALADL2-AS2	0.312	8.15e-13
NOX4	AL391422.4	0.355	2.28e-16
CDKN2A	AC002116.2	0.339	5.74e-15
HELLS	AC002116.2	0.475	1.35e-29
CBS	AC002116.2	0.389	1.38e-19
STMN1	AC002116.2	0.513	5.34e-35
AURKA	AC002116.2	0.325	8.09e-14
MIOX	AC073365.1	0.352	4.27e-16
DDIT3	AC010894.2	0.319	2.6e-13
PTGS2	AC008035.1	0.369	1.15e-17
CDO1	MIR548XHG	0.497	1.1e-32
MT3	MIR548XHG	0.39	1.02e-19
CXCL2	AC004704.1	0.393	5.73e-20
ZFP36	AL021578.1	0.359	1.01e-16
DUSP1	AL021578.1	0.403	4.57e-21
VEGFA	AL021578.1	0.32	1.9e-13
CXCL2	AL021578.1	0.375	3.35e-18
HELLS	AC011297.1	0.388	1.77e-19
CBS	AC011297.1	0.344	2.25e-15
STMN1	AC011297.1	0.445	9.46e-26
STMN1	AC008771.1	0.339	5.35e-15
HELLS	LINC01963	0.36	9.13e-17
TFR2	SNHG20	0.306	2.53e-12
SOCS1	SNHG20	0.322	1.39e-13
LPIN1	SNHG20	0.352	4.03e-16
MIOX	SNHG20	0.386	2.6e-19
HELLS	SNHG20	0.398	1.8e-20
CBS	SNHG20	0.454	5.92e-27
DRD4	SNHG20	0.314	6.46e-13
STMN1	SNHG20	0.448	3.8e-26
MUC1	AC093001.1	0.619	1.64e-54
CDKN2A	LINC01315	0.459	1.65e-27
SOCS1	LINC01315	0.43	4.88e-24
HELLS	LINC01315	0.378	1.52e-18
STMN1	LINC01315	0.392	7.44e-20
LPIN1	SLC25A25-AS1	0.445	7.82e-26
HELLS	SLC25A25-AS1	0.484	8.3e-31
CBS	SLC25A25-AS1	0.384	4.88e-19
CAV1	SLC25A25-AS1	-0.305	2.79e-12
STMN1	SLC25A25-AS1	0.385	3.61e-19
SOCS1	AC084036.1	0.332	2.37e-14
MIOX	AC084036.1	0.316	4.34e-13
CBS	AC084036.1	0.306	2.31e-12
STMN1	AC084036.1	0.444	1.26e-25
HELLS	AC092953.2	0.308	1.63e-12
IFNG	PSMB8-AS1	0.465	2.86e-28
HELLS	AC021028.1	0.373	4.91e-18
STMN1	AC021028.1	0.324	1.05e-13
TFRC	BX293535.1	0.314	5.89e-13
TFR2	BX293535.1	0.311	1.03e-12
MIOX	BX293535.1	0.368	1.65e-17
CBS	BX293535.1	0.309	1.57e-12
TFR2	TOB1-AS1	0.359	1.05e-16
SOCS1	AC103706.1	0.318	2.73e-13
DRD4	AC103706.1	0.303	4.18e-12
STMN1	AC103706.1	0.319	2.42e-13
CDKN2A	AC105942.1	0.308	1.69e-12
SOCS1	AC105942.1	0.335	1.19e-14
MIOX	AC105942.1	0.308	1.78e-12
HELLS	AC105942.1	0.351	5.85e-16
CBS	AC105942.1	0.447	5.59e-26
STMN1	AC105942.1	0.368	1.42e-17
CDKN2A	CDKN2B-AS1	0.435	1.46e-24
HELLS	CDKN2B-AS1	0.343	2.62e-15
STMN1	CDKN2B-AS1	0.332	2.26e-14
NGB	LBX2-AS1	0.33	3.18e-14
MT3	AC104986.2	0.362	5.55e-17
STMN1	AC104986.2	0.354	2.67e-16
CDKN2A	AC091982.3	0.313	7.46e-13
HELLS	AC091982.3	0.325	7.73e-14
STMN1	AC091982.3	0.425	2.01e-23
SOCS1	AC104126.1	0.46	1.3e-27
STMN1	AC104126.1	0.31	1.25e-12
SOCS1	LINC00944	0.409	1.03e-21
IFNG	LINC00944	0.341	3.85e-15
TFR2	DCST1-AS1	0.303	4.08e-12
CDKN2A	DCST1-AS1	0.37	1.09e-17
HELLS	DCST1-AS1	0.366	2.52e-17
STMN1	DCST1-AS1	0.433	2.06e-24
CDKN2A	AC016876.1	0.561	6.35e-43
SOCS1	AC016876.1	0.371	8.75e-18
HELLS	AC016876.1	0.412	5.53e-22
CBS	AC016876.1	0.437	7.33e-25
SLC7A5	AC016876.1	-0.321	1.56e-13
STMN1	AC016876.1	0.569	2.33e-44
SOCS1	AL133215.2	0.353	3.41e-16
HELLS	AL133215.2	0.454	6.18e-27
CBS	AL133215.2	0.353	3.6e-16
STMN1	AL133215.2	0.594	3.19e-49
DUOX1	PITPNA-AS1	-0.3	6.58e-12
STMN1	PITPNA-AS1	0.394	4.24e-20
PRKAA2	AL499627.1	0.642	9.88e-60
PLIN4	AL499627.1	0.655	7.84e-63
CBS	AC004540.2	0.348	1.01e-15
STMN1	AC004540.2	0.305	2.79e-12
NOX5	LINC00460	0.38	1.2e-18
ALOX12	DNAJC3-DT	0.301	5.51e-12
MIOX	AC026471.3	0.308	1.79e-12
NGB	AC026471.3	0.478	5.05e-30
CDO1	AC092279.1	0.395	3.05e-20
CDKN2A	ARRDC1-AS1	0.305	2.79e-12
SOCS1	ARRDC1-AS1	0.381	7.75e-19
SLC2A6	ARRDC1-AS1	0.354	2.64e-16
STMN1	ARRDC1-AS1	0.444	1.25e-25
CBS	DHRS4-AS1	0.301	5.77e-12
SOCS1	AC011462.4	0.4	1.09e-20
HELLS	AC011462.4	0.304	3.4e-12
DRD4	AC011462.4	0.307	1.91e-12
STMN1	AC011462.4	0.402	6.81e-21
CBS	ERICH6-AS1	0.395	3.19e-20
STMN1	ERICH6-AS1	0.429	7.27e-24
TFRC	ZEB1-AS1	0.338	6.52e-15
HELLS	ZEB1-AS1	0.316	3.9e-13
HELLS	LINC00324	0.307	2.2e-12
CAV1	LINC02407	0.376	2.95e-18
CAV1	LINC00941	0.41	9.18e-22
SLC7A5	LINC00941	0.31	1.31e-12
CDKN2A	AL035258.1	0.382	7.18e-19
HELLS	AL035258.1	0.363	4.64e-17
CBS	AL035258.1	0.307	2.13e-12
STMN1	AL035258.1	0.327	5.21e-14
SOCS1	AC024075.2	0.348	1.05e-15
LPIN1	AC024075.2	0.33	3.51e-14
MIOX	AC024075.2	0.314	5.53e-13
HELLS	AC024075.2	0.505	6.52e-34
CBS	AC024075.2	0.304	3.37e-12
STMN1	AC024075.2	0.437	8.17e-25
CAV1	LINC00707	0.308	1.71e-12
TFRC	LINC01063	0.315	4.9e-13
STMN1	LINC01063	0.301	5.91e-12
DDIT3	AL355472.1	0.313	7.46e-13
CAV1	LINP1	0.539	4.31e-39
DDIT3	GAS5	0.332	2.03e-14
DRD4	GAS5	0.308	1.87e-12
STMN1	GAS5	0.353	3.34e-16
SOCS1	AC055854.1	0.416	2.05e-22
HELLS	MGAT3-AS1	0.392	6.47e-20
MIOX	AP005329.2	0.426	1.4e-23
CDKN2A	AC067838.1	0.388	1.85e-19
SOCS1	AC067838.1	0.504	1.2e-33
HELLS	AC067838.1	0.351	5.56e-16
CBS	AC067838.1	0.331	2.72e-14
STMN1	AC067838.1	0.446	5.73e-26
LPIN1	ATP1B3-AS1	0.347	1.28e-15
TFRC	PAXIP1-AS1	0.355	2.23e-16
CBS	PAXIP1-AS1	0.342	3.38e-15
CAV1	PAXIP1-AS1	-0.343	2.61e-15
NOX5	LINCR-0001	0.347	1.24e-15
TFRC	AL035661.1	0.376	2.78e-18
HELLS	AL035661.1	0.326	6.37e-14
CAV1	AL035661.1	-0.365	2.65e-17
DDIT3	U62317.4	0.487	3.44e-31
TRIB3	U62317.4	0.347	1.17e-15
CDO1	AC007405.3	0.345	1.81e-15
MT3	AC007405.3	0.302	4.97e-12
SLC7A11	AC089983.1	0.332	2.27e-14
CAV1	AC068473.5	-0.341	4.17e-15
STMN1	AC068473.5	0.334	1.6e-14
SOCS1	IPO5P1	0.361	7.06e-17
HELLS	IPO5P1	0.455	4.78e-27
CBS	IPO5P1	0.385	3.24e-19
STMN1	IPO5P1	0.49	1.31e-31
STMN1	AL391834.1	0.302	4.96e-12
CAV1	AC245041.1	0.43	4.6e-24
SLC7A5	AC245041.1	0.308	1.78e-12
MUC1	CRNDE	0.306	2.46e-12
HELLS	CRNDE	0.356	1.79e-16
CBS	CRNDE	0.326	6.9e-14
CAV1	CRNDE	-0.301	5.65e-12
DDIT3	CRNDE	0.322	1.51e-13
STMN1	CRNDE	0.555	7.63e-42
TFR2	AL589843.1	0.314	5.67e-13
STMN1	AP002360.1	0.341	3.79e-15
NOX4	AC090559.1	0.369	1.31e-17
RGS4	AC090559.1	0.318	2.74e-13
PRKAA2	AL022323.1	0.545	4.02e-40
LPIN1	AL022323.1	0.354	2.68e-16
PLIN4	AL022323.1	0.544	4.77e-40
CDKN2A	AC012073.1	0.372	6.78e-18
HELLS	AC012073.1	0.586	1.31e-47
STMN1	AC012073.1	0.527	2.95e-37
RRM2	AC012073.1	0.538	5e-39
AURKA	AC012073.1	0.372	6.77e-18
CAV1	WAC-AS1	-0.312	8.07e-13
SLC2A6	LINC02381	0.314	6.43e-13
TFRC	AC009271.1	0.351	5.14e-16
MIOX	LINC00871	0.52	3.61e-36
NGB	LINC00871	0.457	2.68e-27
CDKN2A	AC016773.1	0.369	1.25e-17
SOCS1	AC016773.1	0.43	4.82e-24
HELLS	AC016773.1	0.36	8.31e-17
DRD4	AC016773.1	0.319	2.34e-13
STMN1	AC016773.1	0.52	3.56e-36
SOCS1	KDM4A-AS1	0.385	3.12e-19
LPIN1	KDM4A-AS1	0.304	3.27e-12
HELLS	KDM4A-AS1	0.342	3.1e-15
CBS	KDM4A-AS1	0.376	2.38e-18
STMN1	KDM4A-AS1	0.323	1.2e-13
NOX4	MIR4435-2HG	0.301	5.29e-12
DUOX1	MIR4435-2HG	-0.322	1.3e-13
TFRC	LPP-AS2	0.451	1.77e-26
MIOX	AL162427.1	0.441	2.37e-25
NGB	AL162427.1	0.527	3.12e-37
HELLS	AC010186.3	0.52	4.27e-36
STMN1	AC010186.3	0.32	2.09e-13
CAV1	AP000759.1	0.338	6.79e-15
MIOX	LINC02404	0.404	3.6e-21
CDKN2A	AC019171.1	0.494	2.69e-32
HELLS	AC019171.1	0.502	2.38e-33
CBS	AC019171.1	0.478	4.83e-30
STMN1	AC019171.1	0.635	4.85e-58
RRM2	AC019171.1	0.302	4.45e-12
NOX4	LINC01638	0.326	7.08e-14
CDKN2A	LINC00909	0.302	4.65e-12
SOCS1	LINC00909	0.342	2.96e-15
HELLS	LINC00909	0.478	5.4e-30
STMN1	LINC00909	0.502	1.82e-33
SOCS1	AC090617.5	0.309	1.46e-12
STMN1	AC090617.5	0.348	1.02e-15
CDO1	DSCR8	0.383	5.34e-19
VEGFA	AL049840.1	0.306	2.58e-12
PRKAA2	AC010457.1	0.433	2.67e-24
PLIN4	AC010457.1	0.303	3.86e-12
CDKN2A	AC100861.1	0.313	7.78e-13
SOCS1	AC100861.1	0.311	1.02e-12
LPIN1	AC100861.1	0.31	1.24e-12
HELLS	AC100861.1	0.55	4.58e-41
CBS	AC100861.1	0.356	1.81e-16
STMN1	AC100861.1	0.355	2.18e-16
HELLS	AC005034.3	0.381	8.63e-19
PRKAA2	AC069360.1	0.371	8.33e-18
PLIN4	AC069360.1	0.383	5e-19
STMN1	AL358472.3	0.32	2.13e-13
MIOX	AC068473.3	0.476	9.22e-30
IFNG	USP30-AS1	0.653	2.02e-62
TFRC	AC010731.2	0.411	6.39e-22
LPIN1	AC010731.2	0.355	2.22e-16
SLC7A11	AC010731.2	0.476	9.14e-30
MIOX	AL138760.1	0.411	6.98e-22
MT3	AL138760.1	0.319	2.26e-13
IFNG	TRBV11-2	0.495	1.86e-32
SLC7A5	LINC00886	0.348	1.04e-15
DDIT3	PVT1	0.362	5.29e-17
TRIB3	PVT1	0.313	7.14e-13
EGFR	AP002884.1	0.303	4.36e-12
NOX4	LINC01929	0.543	6.75e-40
MIOX	TRPM2-AS	0.305	2.68e-12
SOCS1	AC108488.1	0.322	1.4e-13
MIOX	AC108488.1	0.498	9.08e-33
NGB	AC108488.1	0.326	6.35e-14
CDO1	AC087623.1	0.496	1.63e-32
MT3	AC087623.1	0.405	3.13e-21
CDKN2A	AL441992.1	0.321	1.85e-13
STMN1	AL441992.1	0.401	8.29e-21
RRM2	AL441992.1	0.333	1.78e-14
AURKA	AL441992.1	0.372	6.77e-18
TFRC	LINC01932	0.345	1.69e-15
GPT2	LINC01932	0.302	4.79e-12
TRIB3	LINC01932	0.321	1.78e-13
DRD4	AP006284.1	0.366	2.47e-17
CAV1	LUARIS	0.316	4.23e-13
STMN1	AC026801.2	0.307	1.95e-12
TFRC	MCF2L-AS1	0.366	2.19e-17
LPIN1	MCF2L-AS1	0.43	5.33e-24
HELLS	MCF2L-AS1	0.464	3.13e-28
CBS	MCF2L-AS1	0.379	1.49e-18
CAV1	MCF2L-AS1	-0.33	3.1e-14
STMN1	MCF2L-AS1	0.428	8.13e-24
TF	LINC02188	0.347	1.22e-15
STMN1	SNHG3	0.303	4.05e-12
SOCS1	AC008443.4	0.326	7.41e-14
STMN1	AC008443.4	0.423	3.03e-23
DUOX1	AC144831.1	0.331	2.77e-14
CDKN2A	AC020907.1	0.41	8.1e-22
HELLS	AC020907.1	0.44	3.16e-25
CBS	AC020907.1	0.3	6.29e-12
CAV1	AC020907.1	-0.309	1.41e-12
STMN1	AC020907.1	0.348	9.83e-16
SOCS1	AC107952.2	0.49	1.2e-31
MIOX	AC107952.2	0.37	9.65e-18
HELLS	AC107952.2	0.38	1.14e-18
CBS	AC107952.2	0.381	9.24e-19
MT3	AC107952.2	0.499	6.03e-33
STMN1	AC107952.2	0.519	6.58e-36
LPIN1	AP001453.2	-0.326	6.73e-14
TFRC	AC131532.1	0.341	4.09e-15
DUOX1	AC244205.1	0.303	3.96e-12
TFRC	AC005586.1	0.354	3.17e-16
ALOX12	AC005586.1	0.314	6.28e-13
LPIN1	AC005586.1	0.351	5.82e-16
CBS	AC005586.1	0.331	2.67e-14
CAV1	AC005586.1	-0.339	5.86e-15
SOCS1	ITGB2-AS1	0.324	9.1e-14
DRD4	ITGB2-AS1	0.381	8.13e-19
SLC2A6	ITGB2-AS1	0.368	1.69e-17
TF	AC080013.4	0.357	1.63e-16
CBS	HOXB-AS3	0.379	1.32e-18
STMN1	HOXB-AS3	0.318	2.79e-13
CDO1	AC091179.1	0.514	3.58e-35
MT3	AC091179.1	0.441	2.99e-25
TFR2	MIR9-3HG	0.366	2.54e-17
CDKN2A	MIR9-3HG	0.57	1.69e-44
HELLS	MIR9-3HG	0.509	1.95e-34
CBS	MIR9-3HG	0.408	1.62e-21
STMN1	MIR9-3HG	0.504	1.26e-33
RRM2	MIR9-3HG	0.415	2.38e-22
MUC1	SNHG9	0.321	1.73e-13
STMN1	AC092803.2	0.358	1.17e-16
CBS	AL354707.1	0.364	3.96e-17
STMN1	AC026979.2	0.305	3e-12
CDKN2A	AL121929.2	0.374	4.06e-18
SOCS1	AL121929.2	0.438	5.89e-25
HELLS	AL121929.2	0.414	3.39e-22
CBS	AL121929.2	0.306	2.4e-12
STMN1	AL121929.2	0.514	3.31e-35
CBS	AP003355.2	0.369	1.26e-17
STMN1	AC005076.1	0.426	1.35e-23
DUOX1	Z95115.1	-0.307	2.21e-12
STMN1	Z95115.1	0.327	5.97e-14
TFR2	SLC12A9-AS1	0.358	1.19e-16
NOX4	AC104083.1	0.571	7.5e-45
RGS4	AC104083.1	0.384	4.08e-19
STMN1	MYLK-AS1	0.358	1.37e-16
SOCS1	PSORS1C3	0.34	4.61e-15
DDIT3	BX470102.1	0.311	1.07e-12
VEGFA	BX470102.1	0.327	6.19e-14
MIOX	AC084819.1	0.314	5.54e-13
TFR2	AL391244.2	0.342	2.91e-15
MIOX	AL391244.2	0.318	3.16e-13
HELLS	AL391244.2	0.32	2.15e-13
DRD4	AL391244.2	0.321	1.62e-13
STMN1	AL391244.2	0.337	7.86e-15
HELLS	AC087481.3	0.385	3.81e-19
DDIT3	AC015982.1	0.379	1.36e-18
TRIB3	AC015982.1	0.315	4.91e-13
STMN1	AC015982.1	0.3	6.35e-12
CDKN2A	AC073896.2	0.369	1.18e-17
HELLS	AC073896.2	0.315	5.38e-13
DDIT3	AC073896.2	0.321	1.83e-13
STMN1	AC073896.2	0.516	1.49e-35
ALOX12	AP001547.1	0.315	4.77e-13
DUOX1	AL049840.3	0.314	5.77e-13
DDIT3	AL049840.3	-0.32	2.09e-13
GPT2	AC093904.2	0.307	2.05e-12
CDKN2A	AC036176.1	0.494	2.61e-32
SOCS1	AC036176.1	0.48	2.67e-30
HELLS	AC036176.1	0.451	1.83e-26
CBS	AC036176.1	0.339	5.49e-15
SLC7A5	AC036176.1	-0.324	9.87e-14
STMN1	AC036176.1	0.477	7.3e-30
MIOX	AC005083.1	0.395	3.77e-20
STMN1	AL391244.1	0.365	2.88e-17
CAV1	LINC02551	0.455	5.28e-27
NOX4	BX322562.1	0.32	2.11e-13
DUOX1	BX322562.1	-0.319	2.34e-13
HELLS	AC010761.1	0.3	6.71e-12
DRD4	AC010761.1	0.331	2.81e-14
STMN1	AC010761.1	0.309	1.34e-12
DUOX1	AC020765.2	-0.302	4.42e-12
SOCS1	AC020765.2	0.409	1.21e-21
CAV1	AC020765.2	-0.327	5.6e-14
DDIT3	AC020765.2	0.369	1.21e-17
DRD4	AC020765.2	0.311	1.01e-12
STMN1	AC020765.2	0.467	1.7e-28
CDKN2A	AC024896.1	0.4	1.17e-20
SOCS1	AC024896.1	0.411	6.63e-22
HELLS	AC024896.1	0.548	1.01e-40
STMN1	AC024896.1	0.419	9.66e-23
DRD4	AP001099.1	0.329	4.03e-14
MIOX	AC090515.4	0.453	9.93e-27
TFRC	AF165147.1	0.316	4.33e-13
TFR2	AL450992.2	0.334	1.39e-14
HELLS	AL450992.2	0.398	1.54e-20
CBS	AL450992.2	0.322	1.4e-13
CAV1	LINC01322	0.46	1.09e-27
LPIN1	AL022322.1	0.344	2.12e-15
MIOX	AL022322.1	0.318	3.03e-13
HELLS	AL022322.1	0.437	7.62e-25
CBS	AL022322.1	0.356	1.95e-16
STMN1	AL022322.1	0.413	3.78e-22
LPIN1	GABPB1-AS1	0.305	2.9e-12
HELLS	GABPB1-AS1	0.354	2.98e-16
DUOX1	NIFK-AS1	-0.328	4.52e-14
HELLS	NIFK-AS1	0.338	6.86e-15
CBS	NIFK-AS1	0.375	3.35e-18
DRD4	NIFK-AS1	0.323	1.29e-13
STMN1	NIFK-AS1	0.417	1.49e-22
TFRC	MUC20-OT1	0.409	1.12e-21
LPIN1	MUC20-OT1	0.304	3.19e-12
HELLS	MUC20-OT1	0.47	6.25e-29
CBS	MUC20-OT1	0.341	3.92e-15
STMN1	MUC20-OT1	0.376	2.53e-18
HELLS	AL445471.1	0.335	1.14e-14
TFRC	AL354754.1	0.316	4.5e-13
STMN1	AL604028.1	0.342	3.4e-15
MIOX	LINC02244	0.48	2.88e-30
SOCS1	AP002360.3	0.436	1.15e-24
HELLS	AP002360.3	0.487	2.81e-31
CBS	AP002360.3	0.393	5.72e-20
STMN1	AP002360.3	0.507	3.78e-34
NOX4	LINC01614	0.719	5.88e-81
RGS4	LINC01614	0.311	9.89e-13
NOX4	LINC01048	0.316	4.3e-13
DUOX1	CYTOR	-0.301	5.71e-12
SOCS1	DLG5-AS1	0.309	1.52e-12
MUC1	DLG5-AS1	0.373	5.51e-18
DUOX1	TRIM52-AS1	-0.301	5.98e-12
STMN1	TRIM52-AS1	0.361	6.34e-17
DDIT3	AC107294.2	0.386	2.59e-19
TRIB3	AC107294.2	0.305	2.95e-12
CDKN2A	LINC02004	0.324	1.07e-13
CBS	LINC02004	0.372	6.97e-18
STMN1	LINC02004	0.302	4.57e-12
LPIN1	AC022144.1	0.325	8.12e-14
MIOX	AC022144.1	0.318	2.83e-13
SLC7A11	AL596223.1	0.477	7e-30
HELLS	LINC01139	0.429	7.38e-24
ZFP36	AC036176.3	0.353	3.77e-16
DUSP1	AC036176.3	0.318	2.72e-13
CDKN2A	AC019131.2	0.353	3.84e-16
SOCS1	AC019131.2	0.344	2.3e-15
HELLS	AC019131.2	0.427	1.1e-23
CBS	AC019131.2	0.302	4.85e-12
STMN1	AC019131.2	0.465	2.89e-28
TFRC	KCNMB2-AS1	0.31	1.22e-12
DDIT3	KCNMB2-AS1	0.311	1.09e-12
NOX4	AC134312.5	0.676	3.55e-68
RGS4	AC134312.5	0.339	5.8e-15
CBS	AP005120.1	0.37	1.01e-17
SOCS1	AC008649.1	0.449	2.75e-26
LPIN1	AC008649.1	0.376	2.72e-18
MIOX	AC008649.1	0.372	5.97e-18
HELLS	AP000697.1	0.34	4.4e-15
TFRC	LINC01564	0.397	1.89e-20
SLC7A11	LINC01564	0.461	8.89e-28
CAV1	AL138781.1	-0.301	5.65e-12
MT3	AL138781.1	0.324	1.07e-13
DRD4	AL138781.1	0.304	3.47e-12
STMN1	AL138781.1	0.339	5.8e-15
DDIT3	AP001033.2	0.323	1.19e-13
VEGFA	AP001033.2	0.392	7.13e-20
TFR2	APTR	0.446	7.48e-26
LPIN1	APTR	0.305	3.05e-12
MIOX	APTR	0.373	5.56e-18
HELLS	APTR	0.409	1.15e-21
CBS	APTR	0.408	1.54e-21
DDIT3	APTR	0.377	1.92e-18
STMN1	APTR	0.427	1.23e-23
HELLS	AP006621.2	0.349	7.68e-16
SLC7A11	AL033397.2	0.31	1.27e-12
HELLS	MAST4-AS1	0.349	8.11e-16
STMN1	MAST4-AS1	0.339	5.72e-15
SOCS1	ATP2A1-AS1	0.312	8.76e-13
STMN1	ATP2A1-AS1	0.465	2.47e-28
STMN1	UBR5-AS1	0.342	3.06e-15
DDIT3	AC131009.3	0.314	6.36e-13
TRIB3	AC131009.3	0.353	3.26e-16
TRIB3	AC002351.1	0.362	5.7e-17
CDKN2A	AL645933.2	0.301	5.53e-12
STMN1	AL645933.2	0.324	9.23e-14
TFR2	AC005863.1	0.341	4.01e-15
CDO1	EWSAT1	0.419	8.85e-23
HELLS	EWSAT1	0.309	1.49e-12
MT3	EWSAT1	0.408	1.3e-21
ANGPTL7	AL512785.1	0.325	8.1e-14
CDKN2A	PTOV1-AS1	0.439	4.84e-25
SOCS1	PTOV1-AS1	0.34	4.59e-15
HELLS	PTOV1-AS1	0.45	1.97e-26
CBS	PTOV1-AS1	0.307	1.99e-12
STMN1	PTOV1-AS1	0.543	6.48e-40
SOCS1	AL359921.2	0.368	1.54e-17
LPIN1	AL359921.2	0.328	4.46e-14
STMN1	AL359921.2	0.418	1.33e-22
LPIN1	AC008735.2	0.332	2.21e-14
HELLS	AC008735.2	0.429	7.64e-24
LPIN1	ANKRD10-IT1	0.416	1.91e-22
HELLS	ANKRD10-IT1	0.426	1.4e-23
DDIT3	AC069281.2	0.317	3.3e-13
DRD4	AC069281.2	0.342	3.48e-15
HELLS	LINC01184	0.305	2.74e-12
NOX5	AC007159.1	0.333	1.87e-14
TFRC	MID1IP1-AS1	0.355	2.29e-16
LPIN1	MID1IP1-AS1	0.311	9.66e-13
IFNG	AL157871.2	0.415	2.47e-22
SOCS1	AC007996.1	0.335	1.3e-14
HELLS	AC007996.1	0.493	3.7e-32
CBS	AC007996.1	0.465	2.98e-28
STMN1	AC007996.1	0.391	9e-20
ALOX12	AC006001.2	0.34	4.38e-15
SOCS1	NALT1	0.338	7.27e-15
DRD4	NALT1	0.309	1.33e-12
STMN1	NALT1	0.394	3.88e-20
CDO1	AC004034.1	0.427	1.14e-23
MIOX	AC004034.1	0.43	4.96e-24
MT3	AC004034.1	0.473	2.42e-29
DRD4	AC004034.1	0.387	2.14e-19
HELLS	LINC00997	0.319	2.39e-13
NOX4	LINC02544	0.483	9.61e-31
MIOX	AC018645.2	0.321	1.57e-13
HELLS	AC018645.2	0.36	7.84e-17
STMN1	AC018645.2	0.338	6.64e-15
LPIN1	AC008764.2	0.382	6.5e-19
HELLS	AC008764.2	0.485	6.09e-31
HELLS	AC016065.1	0.334	1.63e-14
CBS	AC016065.1	0.347	1.28e-15
MT3	AC016065.1	0.33	3.07e-14
STMN1	AC016065.1	0.418	1.31e-22
TFR2	NCK1-DT	0.335	1.15e-14
MIOX	NCK1-DT	0.306	2.28e-12
HELLS	NCK1-DT	0.37	1.05e-17
STMN1	NCK1-DT	0.308	1.59e-12
CAV1	URB1-AS1	-0.302	5.12e-12
DDIT3	URB1-AS1	0.316	4.17e-13
STMN1	URB1-AS1	0.353	3.7e-16
LPIN1	AC012236.1	0.367	1.93e-17
SOCS1	MIR155HG	0.33	3.32e-14
IFNG	MIR155HG	0.623	3.11e-55
HELLS	MIR155HG	0.307	1.98e-12
STMN1	MIR155HG	0.34	4.37e-15
CDKN2A	AC007114.1	0.3	6.43e-12
HELLS	AC007114.1	0.306	2.62e-12
CBS	AC007114.1	0.309	1.55e-12
STMN1	AC007114.1	0.369	1.29e-17
NOX4	LINC01705	0.453	8.78e-27
CDKN2A	AF131215.6	0.474	1.89e-29
SOCS1	AF131215.6	0.518	8.44e-36
HELLS	AF131215.6	0.487	3.37e-31
CBS	AF131215.6	0.31	1.14e-12
CAV1	AF131215.6	-0.302	4.8e-12
SLC7A5	AF131215.6	-0.301	6.03e-12
STMN1	AF131215.6	0.463	4.24e-28
SLC7A11	AL391427.1	0.447	4.81e-26
CBS	AL022313.2	0.384	4.43e-19
STMN1	AL022313.2	0.336	1.05e-14
MIOX	AC128709.2	0.467	1.61e-28
PRKAA2	AC091563.1	0.538	4.8e-39
PLIN4	AC091563.1	0.625	8.6e-56
MIOX	AL049870.3	0.448	3.81e-26
NGB	AL049870.3	0.334	1.38e-14
HELLS	AC010643.1	0.394	4.5e-20
CBS	AC010643.1	0.413	4.6e-22
STMN1	AC010643.1	0.39	1.09e-19
CDKN2A	AC005696.1	0.354	2.94e-16
SOCS1	AC005696.1	0.34	4.39e-15
HELLS	AC005696.1	0.497	9.83e-33
CBS	AC005696.1	0.419	8.48e-23
STMN1	AC005696.1	0.485	5.56e-31
SOCS1	AP001505.1	0.329	3.95e-14
STMN1	AP001505.1	0.35	6.12e-16
TFRC	SYNPR-AS1	0.395	3.67e-20
HELLS	SYNPR-AS1	0.353	3.71e-16
CBS	SYNPR-AS1	0.308	1.78e-12
CAV1	SYNPR-AS1	-0.314	5.96e-13
STMN1	SYNPR-AS1	0.31	1.15e-12
CAV1	LINC02454	0.401	8.16e-21
DDIT3	AC069148.1	0.313	7.18e-13
TFR2	LINC00526	0.307	2.03e-12
MIOX	LINC00526	0.364	3.28e-17
HELLS	LINC00526	0.375	3.18e-18
CBS	LINC00526	0.353	3.47e-16
DRD4	LINC00526	0.343	2.75e-15
STMN1	LINC00526	0.438	5.5e-25
NOX5	AC104964.3	0.346	1.59e-15
SOCS1	AP003419.3	0.324	1e-13
MUC1	CPNE8-AS1	0.459	1.45e-27
CBS	AC139530.1	0.313	7.73e-13
STMN1	AC139530.1	0.426	1.7e-23
CDO1	AC104958.2	0.657	3.15e-63
MT3	AC104958.2	0.561	6.92e-43
HELLS	AC007038.2	0.451	1.71e-26
STMN1	AC007038.2	0.489	1.67e-31
LPIN1	OR2A1-AS1	0.311	1.04e-12
TFR2	AC099568.2	0.303	3.9e-12
MIOX	AC099568.2	0.428	8.91e-24
CBS	AC099568.2	0.363	4.41e-17
SOCS1	AATBC	0.337	9.33e-15
MIOX	AATBC	0.302	4.83e-12
HELLS	AATBC	0.308	1.58e-12
NOX4	AP001434.1	0.44	3.77e-25
MIOX	C10orf91	0.472	3.09e-29
CAV1	SFTA1P	0.375	3.35e-18
PTGS2	AC008011.2	0.32	2.12e-13
SOCS1	AL591895.1	0.347	1.13e-15
LPIN1	AL591895.1	0.308	1.62e-12
MUC1	AL591895.1	0.312	9.2e-13
HELLS	AL591895.1	0.374	4.04e-18
CAV1	AL591895.1	-0.307	2.17e-12
DRD4	AL591895.1	0.35	6.32e-16
STMN1	AL591895.1	0.45	2.12e-26
CDKN2A	FLJ37453	0.327	5.7e-14
HELLS	FLJ37453	0.401	8.74e-21
CBS	FLJ37453	0.37	9.3e-18
CAV1	FLJ37453	-0.322	1.51e-13
STMN1	FLJ37453	0.515	2.18e-35
SOCS1	AL109811.3	0.349	7.55e-16
HELLS	AL109811.3	0.401	8.34e-21
STMN1	AL109811.3	0.443	1.33e-25
LPIN1	AC015813.1	0.314	5.59e-13
HELLS	AC015813.1	0.422	3.83e-23
CBS	AC015813.1	0.313	6.82e-13
STMN1	AC015813.1	0.389	1.34e-19
LPIN1	AC090589.3	0.348	9.74e-16
HELLS	AC090589.3	0.375	3.66e-18
SOCS1	AC009005.1	0.303	3.82e-12
CDO1	AC009005.1	0.378	1.62e-18
MIOX	AC009005.1	0.315	4.72e-13
HELLS	AC009005.1	0.375	3.51e-18
CBS	AC009005.1	0.396	2.84e-20
MT3	AC009005.1	0.469	7.92e-29
STMN1	AC009005.1	0.502	2.31e-33
CAV1	TTLL11-IT1	0.512	5.85e-35
HELLS	SNHG1	0.497	1.15e-32
CBS	SNHG1	0.345	1.82e-15
STMN1	SNHG1	0.465	3e-28
TFRC	LNCTAM34A	0.367	1.92e-17
CDKN2A	LNCTAM34A	0.378	1.86e-18
HELLS	LNCTAM34A	0.417	1.67e-22
CBS	LNCTAM34A	0.324	1.05e-13
CAV1	LNCTAM34A	-0.346	1.58e-15
STMN1	LNCTAM34A	0.435	1.23e-24
GPT2	AC083801.2	0.335	1.14e-14
MT3	AC131902.1	0.357	1.67e-16
DUOX1	LINC00847	-0.312	8.42e-13
SOCS1	LINC00847	0.314	5.94e-13
LPIN1	LINC00847	0.337	7.93e-15
HELLS	LINC00847	0.387	2.14e-19
CBS	LINC00847	0.39	1.2e-19
SLC7A5	LINC00847	-0.321	1.57e-13
STMN1	LINC00847	0.472	2.95e-29
HELLS	AL117336.3	0.384	4.68e-19
MUC1	AL133370.1	0.501	3.48e-33
STMN1	AC093726.1	0.302	4.49e-12
HELLS	DLEU2	0.474	1.61e-29
STMN1	DLEU2	0.37	1.07e-17
RRM2	DLEU2	0.394	3.97e-20
AURKA	DLEU2	0.451	1.46e-26
SOCS1	AL117379.1	0.341	3.77e-15
STMN1	AL117379.1	0.382	6.89e-19
HELLS	AC022150.2	0.342	3.36e-15
HELLS	LINC00839	0.328	5.08e-14
STMN1	LINC00839	0.3	6.69e-12
TFR2	LINC02432	0.331	2.44e-14
LPIN1	AL354733.3	0.331	2.76e-14
HELLS	AL354733.3	0.451	1.48e-26
CDKN2A	FGD5-AS1	0.315	5.44e-13
LPIN1	FGD5-AS1	0.36	8.13e-17
HELLS	FGD5-AS1	0.591	1.41e-48
CBS	FGD5-AS1	0.319	2.57e-13
STMN1	FGD5-AS1	0.437	8.14e-25
RRM2	FGD5-AS1	0.361	6.61e-17
MIOX	AC079336.5	0.472	3.19e-29
DUOX1	AL392172.1	-0.318	2.71e-13
SOCS1	AL392172.1	0.324	1.02e-13
HELLS	AL392172.1	0.329	3.87e-14
CAV1	AL392172.1	-0.322	1.54e-13
DDIT3	AL392172.1	0.303	4.02e-12
STMN1	AL392172.1	0.524	1e-36
CDKN2A	AC109347.2	0.398	1.69e-20
SOCS1	AC109347.2	0.349	7.79e-16
HELLS	AC109347.2	0.401	8.23e-21
CBS	AC109347.2	0.448	4.27e-26
CAV1	AC109347.2	-0.326	7.05e-14
STMN1	AC109347.2	0.544	4.93e-40
MIOX	LINC02308	0.425	2.11e-23
LPIN1	RAD51-AS1	0.395	3.09e-20
HELLS	RAD51-AS1	0.505	8.57e-34
CBS	RAD51-AS1	0.332	2.28e-14
STMN1	RAD51-AS1	0.403	4.45e-21
PRKAA2	AC005393.1	0.322	1.48e-13
LPIN1	AC005393.1	0.306	2.61e-12
PLIN4	AC005393.1	0.453	8.44e-27
CDKN2A	MELTF-AS1	0.345	1.79e-15
SOCS1	MELTF-AS1	0.422	4.04e-23
HELLS	MELTF-AS1	0.41	9.03e-22
CBS	MELTF-AS1	0.425	2.11e-23
DRD4	MELTF-AS1	0.314	6.06e-13
STMN1	MELTF-AS1	0.561	6.68e-43
MIOX	LINC01694	0.424	2.86e-23
TF	LINC02487	0.329	4.24e-14
HELLS	HOTAIR	0.301	5.23e-12
PRKAA2	AL592424.1	0.75	9.57e-92
PLIN4	AL592424.1	0.795	1.11e-110
CDO1	CU104787.1	0.333	1.96e-14
VEGFA	AC039056.2	0.416	2.05e-22
HELLS	AC002310.1	0.362	6e-17
CBS	AC002310.1	0.342	3.25e-15
DRD4	AC002310.1	0.303	3.9e-12
STMN1	AC002310.1	0.397	2.24e-20
LPIN1	AL133243.2	0.418	1.3e-22
DUOX1	AL512274.1	0.552	2.38e-41
CDKN2A	FOXD3-AS1	0.341	3.79e-15
SOCS1	FOXD3-AS1	0.384	3.97e-19
MIOX	FOXD3-AS1	0.443	1.54e-25
HELLS	FOXD3-AS1	0.387	2.45e-19
CBS	FOXD3-AS1	0.41	9.13e-22
MT3	FOXD3-AS1	0.408	1.35e-21
STMN1	FOXD3-AS1	0.501	3.32e-33
CDO1	MIAT	0.558	2.18e-42
MT3	MIAT	0.467	1.52e-28
SLC7A11	AL033397.1	0.483	1.01e-30
NOX4	AC080038.1	0.353	3.83e-16
NOX5	LINC00973	0.372	6.8e-18
SLC2A6	LINC00973	0.37	8.86e-18
CAV1	AL135818.2	0.373	4.99e-18
HELLS	AC100814.1	0.341	4.26e-15
STMN1	AC100814.1	0.452	1.32e-26
TFRC	AC005332.6	0.318	3.09e-13
TFR2	AC005332.6	0.309	1.52e-12
CDKN2A	AC005332.6	0.313	6.57e-13
LPIN1	AC005332.6	0.385	3.23e-19
HELLS	AC005332.6	0.534	2.48e-38
CBS	AC005332.6	0.469	8.92e-29
CAV1	AC005332.6	-0.305	2.79e-12
STMN1	AC005332.6	0.459	1.8e-27
DDIT3	AC004241.3	0.309	1.45e-12
TRIB3	AC004241.3	0.354	3.18e-16
DDIT3	AL451165.2	0.318	2.71e-13
STMN1	AL451165.2	0.307	1.92e-12
MUC1	AC025181.2	0.397	2.22e-20
CDKN2A	LIPE-AS1	0.352	4.23e-16
LPIN1	SNHG4	0.349	8.55e-16
HELLS	SNHG4	0.357	1.54e-16
TFRC	LINC02561	0.417	1.47e-22
SLC7A11	LINC02561	0.499	5.36e-33
TFR2	AP000251.1	0.317	3.33e-13
CDKN2A	AP000251.1	0.336	1.05e-14
HELLS	AP000251.1	0.35	5.91e-16
CBS	AP000251.1	0.379	1.27e-18
STMN1	AP000251.1	0.542	1.06e-39
HELLS	PRKAG2-AS1	0.32	1.91e-13
CBS	PRKAG2-AS1	0.494	2.85e-32
STMN1	PRKAG2-AS1	0.448	4.25e-26
TFRC	LOXL1-AS1	0.36	8.9e-17
LPIN1	LOXL1-AS1	0.397	2.24e-20
TF	AC008406.3	0.461	8.48e-28
STMN1	AC008406.3	0.328	4.69e-14
TFRC	AC019080.4	0.304	3.61e-12
LPIN1	AC005332.4	0.389	1.24e-19
MIOX	AC005332.4	0.374	4.41e-18
HELLS	AC005332.4	0.396	3.03e-20
CBS	AC005332.4	0.419	1.01e-22
CAV1	AC005332.4	-0.354	2.82e-16
STMN1	AC005332.4	0.433	2.25e-24
TFR2	AL355338.1	0.352	3.95e-16
HELLS	AL355338.1	0.373	5.49e-18
CAV1	AL355338.1	-0.302	4.99e-12
MIOX	DLGAP1-AS2	0.318	3.1e-13
CBS	DLGAP1-AS2	0.3	6.63e-12
TRIB3	DLGAP1-AS2	0.382	6.47e-19
CAV1	AL596244.1	0.454	7.06e-27
CDKN2A	AC025176.1	0.366	2.25e-17
SOCS1	AC025176.1	0.306	2.62e-12
HELLS	AC025176.1	0.533	3e-38
CBS	AC025176.1	0.333	1.97e-14
STMN1	AC025176.1	0.55	5.21e-41
RRM2	AC025176.1	0.304	3.19e-12
DUOX1	PLA2G4E-AS1	0.527	2.8e-37
TRIB3	AC016394.1	0.34	4.7e-15
SLC7A11	AC005722.3	0.4	9.88e-21
SOCS1	AL157394.1	0.41	9.7e-22
HELLS	AL157394.1	0.426	1.54e-23
STMN1	AL157394.1	0.324	9.05e-14
SOCS1	AL023803.2	0.453	8.36e-27
MIOX	AL023803.2	0.308	1.71e-12
STMN1	AL023803.2	0.443	1.73e-25
HELLS	AC004656.1	0.426	1.54e-23
CBS	AC004656.1	0.411	7.79e-22
SLC7A5	AC004656.1	-0.306	2.23e-12
STMN1	AC004656.1	0.404	3.93e-21
MT3	STX17-AS1	0.347	1.09e-15
LPIN1	AC024075.1	0.363	4.26e-17
HELLS	AC024075.1	0.411	7.48e-22
CDO1	SCGB1B2P	0.655	8.67e-63
MT3	SCGB1B2P	0.584	3.35e-47
CDKN2A	AC005082.1	0.34	4.64e-15
MIOX	AC005082.1	0.316	3.99e-13
STMN1	LINC00685	0.333	1.85e-14
CDKN2A	AC016205.1	0.419	9.2e-23
HELLS	AC016205.1	0.638	8.62e-59
CBS	AC016205.1	0.476	8.42e-30
STMN1	AC016205.1	0.569	1.79e-44
RRM2	AC016205.1	0.373	4.8e-18
IFNG	AL365361.1	0.427	1.11e-23
LPIN1	AL365361.1	0.328	4.5e-14
CDKN2A	AL079303.1	0.381	9.24e-19
HELLS	AL079303.1	0.461	9.28e-28
CBS	AL079303.1	0.429	6.94e-24
STMN1	AL079303.1	0.491	7.85e-32
LPIN1	LINC00265	0.35	6.61e-16
HELLS	LINC00265	0.372	5.89e-18
TFR2	ELFN1-AS1	0.404	3.68e-21
MIOX	ELFN1-AS1	0.404	3.79e-21
NGB	ELFN1-AS1	0.331	2.45e-14

## Sheet: Table S4
Table S4. Significant correlated ICPs with PFLS risk score.
id	gene	chrom	chromStart	chromEnd	strand	Correlation with risk score			Differential expression analysis
									Low-risk vs High-risk				Cancer vs Normal
						rho	p	q	Mean_High-risk	Mean_Low-risk	p	q	Mean_cancer	Mean_normal	p	q
ENSG00000186891	TNFRSF18	chr1	1203508	1206691	-	-0.333798	2.11863e-14	6.35588e-14	3.07845	3.78801	4.89068e-10	1.37255e-09	3.43323	2.00227	5.16616e-11	2.24728e-10
ENSG00000186827	TNFRSF4	chr1	1211326	1214138	-	-0.377296	0	0	1.4695	2.0204	1.28469e-15	8.59754e-15	1.74495	0.67586	4.63938e-18	6.20964e-17
ENSG00000215788	TNFRSF25	chr1	6461151	6466195	-	-0.371398	0	0	2.01441	2.52092	2.63648e-13	1.23986e-12	2.26767	1.35581	3.81754e-12	2.01288e-11
ENSG00000049249	TNFRSF9	chr1	7915894	7943165	-	-0.321915	1.93779e-13	5.26837e-13	0.699113	1.04102	7.46451e-09	1.73177e-08	0.870067	0.26693	2.04841e-15	1.54967e-14
ENSG00000120949	TNFRSF8	chr1	12063377	12144207	+	-0.258016	5.08145e-09	9.40609e-09	0.575438	0.746183	6.17415e-07	1.19367e-06	0.660811	0.275636	3.29906e-10	1.27564e-09
ENSG00000117713	ARID1A	chr1	26696033	26782104	+	-0.273394	5.53051e-10	1.06923e-09	3.55963	3.81934	2.93175e-06	5.18376e-06	3.68949	3.45585	0.00703271	0.0104013
ENSG00000134690	CDCA8	chr1	37692418	37709719	+	-0.212223	1.69766e-06	2.63743e-06	3.61525	3.8327	0.000505087	0.000708751	3.72398	2.11954	4.67134e-21	1.01602e-19
ENSG00000143365	RORC	chr1	151806071	151831872	-	-0.318073	3.85997e-13	1.00244e-12	0.426912	0.694062	3.64016e-10	1.03834e-09	0.560487	2.07597	2.61394e-21	6.49752e-20
ENSG00000066294	CD84	chr1	160541095	160579516	-	-0.358069	1.16364e-16	4.49941e-16	0.693689	1.12167	1.27473e-11	4.34908e-11	0.907678	0.53695	0.000706798	0.00119401
ENSG00000026751	SLAMF7	chr1	160739057	160754821	+	-0.336914	1.15739e-14	3.66158e-14	1.90315	2.52155	1.84959e-10	5.64611e-10	2.21235	1.53827	1.1361e-05	2.47101e-05
ENSG00000120337	TNFSF18	chr1	173039960	173050963	-	-0.201341	5.45407e-06	8.11118e-06	0.664108	0.862064	2.5639e-05	4.05563e-05	0.763086	0.43772	0.0134151	0.0186739
ENSG00000117586	TNFSF4	chr1	173183734	173207313	-	-0.218336	8.35577e-07	1.33386e-06	0.852328	1.06941	0.000100613	0.00014963	0.960868	0.22789	1.67131e-18	2.4234e-17
ENSG00000136634	IL10	chr1	206767602	206772494	-	-0.167808	0.000161845	0.000213341	0.418935	0.51486	0.000727579	0.000996841	0.466897	0.298334	2.19083e-05	4.64883e-05
ENSG00000171848	RRM2	chr2	10122328	10131419	+	-0.198414	7.82359e-06	1.15365e-05	4.09622	4.36682	0.00042084	0.000595335	4.23152	2.84683	5.46162e-15	3.80129e-14
ENSG00000169679	BUB1	chr2	110637698	110678114	-	-0.179986	5.13817e-05	7.15234e-05	2.51181	2.69519	0.00234247	0.00304172	2.6035	1.31517	6.88691e-21	1.33147e-19
ENSG00000153208	MERTK	chr2	111898479	112029561	+	-0.406787	0	0	1.15688	1.72384	1.55281e-15	1.0007e-14	1.44036	1.10011	0.00835223	0.0121107
ENSG00000115008	IL1A	chr2	112773915	112784590	-	0.227169	2.89392e-07	4.70601e-07	3.79591	3.16614	6.86845e-05	0.000103027	3.48103	1.89256	9.03787e-09	2.75893e-08
ENSG00000121966	CXCR4	chr2	136114349	136118165	-	-0.436199	0	0	3.17776	4.19305	2.56161e-16	1.85716e-15	3.68541	2.99002	0.00038469	0.000662733
ENSG00000178562	CD28	chr2	203706475	203738912	+	-0.395362	0	0	0.442436	0.809513	1.00865e-13	5.01442e-13	0.625975	0.415337	0.00478947	0.00724668
ENSG00000163599	CTLA4	chr2	203867786	203873960	+	-0.418355	0	0	1.1283	1.71643	5.63427e-16	3.92145e-15	1.42236	0.517924	2.05127e-14	1.37277e-13
ENSG00000118260	CREB1	chr2	207529737	207603431	+	-0.114262	0.0104371	0.0124387	2.38557	2.48299	0.00883487	0.0109026	2.43428	2.1568	4.41518e-06	1.01084e-05
ENSG00000163464	CXCR1	chr2	218162845	218166995	-	0.170457	0.000124165	0.000170116	0.843391	0.636206	0.000550987	0.000766974	0.739798	0.382098	0.00094906	0.00152904
ENSG00000188389	PDCD1	chr2	241849881	241858908	-	-0.48485	5.86053e-31	3.18666e-30	0.759582	1.44881	4.02443e-20	4.66834e-19	1.10419	0.760371	0.0206899	0.0279073
ENSG00000121807	CCR2	chr3	46353734	46360928	+	-0.389413	1.26427e-19	5.78902e-19	0.371403	0.715488	9.79813e-13	4.26219e-12	0.543446	0.609604	0.0371257	0.049312
ENSG00000160791	CCR5	chr3	46370854	46376206	+	-0.45165	0	0	1.05898	1.79992	3.40906e-18	2.82465e-17	1.42945	1.05748	0.021525	0.0288104
ENSG00000213689	TREX1	chr3	48465811	48467645	+	-0.345953	1.8552e-15	6.2078e-15	0.0453328	0.0619523	1.70677e-10	5.36755e-10	0.0536426	0.0406309	0.0139674	0.0191364
ENSG00000114383	TUSC2	chr3	50320027	50328251	-	-0.27405	5.01568e-10	9.80595e-10	2.83236	3.02259	2.27906e-08	4.89575e-08	2.92747	3.17294	5.56041e-05	0.000107501
ENSG00000114455	HHLA2	chr3	108296490	108378285	+	-0.168748	0.000145446	0.000194674	0.0635084	0.115019	0.00165596	0.00219952	0.0892635	0.115388	0.00220248	0.00348392
ENSG00000091972	CD200	chr3	112332347	112362812	+	-0.290432	4.02188e-11	8.7476e-11	1.32822	1.81708	2.03465e-07	4.02306e-07	1.57265	1.29792	0.0117391	0.0166066
ENSG00000163606	CD200R1	chr3	112921209	112975122	-	-0.442834	0	0	0.295502	0.573393	2.03229e-20	2.94682e-19	0.434448	0.99595	2.54116e-05	5.26383e-05
ENSG00000181847	TIGIT	chr3	114276913	114310288	+	-0.464419	0	0	0.770124	1.35805	2.5455e-19	2.76823e-18	1.06409	0.426321	1.459e-10	6.19187e-10
ENSG00000121594	CD80	chr3	119524293	119559602	-	-0.20744	2.91527e-06	4.44962e-06	0.441512	0.595677	1.29051e-05	2.11838e-05	0.518594	0.125919	1.61082e-17	2.00202e-16
ENSG00000114013	CD86	chr3	122055366	122121139	+	-0.207265	2.97305e-06	4.49836e-06	1.86075	2.16689	1.4889e-05	2.4212e-05	2.01382	1.29044	6.6413e-10	2.4587e-09
ENSG00000168811	IL12A	chr3	159988750	159996019	+	-0.480811	2.10722e-30	1.11108e-29	0.143489	0.345904	3.18147e-20	4.25828e-19	0.244697	0.51073	0.000142085	0.000263008
ENSG00000004468	CD38	chr4	15778275	15853230	+	-0.334738	1.76767e-14	5.39605e-14	1.28789	1.83477	5.70851e-11	1.91016e-10	1.56133	0.917825	2.2852e-05	4.79066e-05
ENSG00000169245	CXCL10	chr4	76021117	76023497	-	-0.193524	1.31171e-05	1.8708e-05	4.73936	5.51926	0.00024019	0.000348275	5.12931	2.67611	2.65116e-10	1.04841e-09
ENSG00000164136	IL15	chr4	141636599	141733987	+	-0.350569	6.85648e-16	2.38605e-15	0.648899	0.960272	7.45633e-11	2.44793e-10	0.804586	0.473389	4.87987e-06	1.096e-05
ENSG00000164342	TLR3	chr4	186069152	186088069	+	-0.173746	9.33813e-05	0.000128955	1.08543	1.26524	0.00380293	0.00482999	1.17534	1.65668	2.44816e-06	5.67973e-06
ENSG00000132356	PRKAA1	chr5	40759379	40798374	-	-0.108657	0.0149007	0.0175983	3.04921	3.15962	0.0137899	0.0164345	3.10441	2.89067	0.00705377	0.0104013
ENSG00000145649	GZMA	chr5	55102648	55110252	+	-0.341328	4.81088e-15	1.57942e-14	2.45499	3.38208	7.24657e-12	2.74109e-11	2.91853	2.09023	0.000228783	0.000402103
ENSG00000113249	HAVCR1	chr5	157029413	157059119	-	-0.367997	1.52084e-17	6.61564e-17	0.0205869	0.0672339	1.48721e-12	6.31156e-12	0.0439104	0.00873302	4.91309e-06	1.096e-05
ENSG00000135077	HAVCR2	chr5	157085832	157142869	-	-0.319022	3.25914e-13	8.59229e-13	1.63925	2.13495	5.10627e-10	1.4103e-09	1.8871	1.15414	8.52029e-09	2.64738e-08
ENSG00000186470	BTN3A2	chr6	26365159	26378320	+	-0.202913	4.80879e-06	7.21318e-06	2.73482	3.00936	5.33402e-05	8.14139e-05	2.87209	2.14661	5.14112e-09	1.66652e-08
ENSG00000026950	BTN3A1	chr6	26402237	26415216	+	-0.25792	5.15007e-09	9.43276e-09	2.40898	2.80107	2.48988e-08	5.2834e-08	2.60502	1.88559	3.67158e-09	1.27771e-08
ENSG00000111801	BTN3A3	chr6	26440472	26453415	+	-0.153927	0.000545981	0.000698535	2.31285	2.55141	0.000820632	0.00111555	2.43213	1.73632	1.82025e-08	5.19219e-08
ENSG00000112763	BTN2A1	chr6	26457904	26476621	+	-0.294286	2.16873e-11	4.83794e-11	2.41193	2.71004	3.15675e-10	9.15458e-10	2.56099	2.11724	1.42691e-08	4.20817e-08
ENSG00000124557	BTN1A1	chr6	26501221	26510422	+	-0.362244	5.18884e-17	2.09967e-16	0.0238152	0.0582137	1.17915e-11	4.18718e-11	0.0410145	0.0142597	0.00237972	0.00369706
ENSG00000232810	TNF	chr6	31575567	31578336	+	-0.126396	0.00458921	0.00565092	1.41861	1.57896	0.0118205	0.0141846	1.49879	1.12561	0.0154682	0.0210271
ENSG00000112715	VEGFA	chr6	43770184	43786487	+	-0.136762	0.0021504	0.00269187	3.12099	3.33037	0.0106001	0.0129889	3.22568	2.24437	2.4599e-12	1.33757e-11
ENSG00000112742	TTK	chr6	80003887	80042527	+	-0.19598	1.01336e-05	1.48171e-05	2.34553	2.52218	0.00144382	0.00193249	2.43385	1.32287	1.77824e-17	2.06276e-16
ENSG00000135318	NT5E	chr6	85449584	85495791	+	0.357058	1.50274e-16	5.5652e-16	3.42531	2.65765	6.25748e-10	1.70125e-09	3.04148	1.84659	1.48618e-08	4.30991e-08
ENSG00000135333	EPHA7	chr6	93240020	93419547	-	-0.24739	1.94776e-08	3.42333e-08	0.21016	0.325065	2.11511e-06	3.83363e-06	0.267612	0.352793	0.000170689	0.00031263
ENSG00000146648	EGFR	chr7	55019021	55256620	+	0.195117	1.10991e-05	1.60937e-05	4.85488	4.53313	0.000168329	0.000246128	4.694	3.87345	5.40415e-07	1.42473e-06
ENSG00000105810	CDK6	chr7	92604921	92836594	-	0.285046	9.38707e-11	1.96789e-10	3.29399	2.94153	0.000141565	0.000208748	3.11776	2.09391	1.18405e-12	6.8675e-12
ENSG00000106462	EZH2	chr7	148807383	148884321	-	-0.502497	0	0	2.38459	3.02297	5.07099e-21	1.10294e-19	2.70378	1.91896	1.20492e-08	3.61475e-08
ENSG00000131203	IDO1	chr8	39902275	39928444	+	-0.35927	8.50227e-17	3.36226e-16	2.17052	3.32751	1.06126e-11	3.92893e-11	2.74902	1.22211	4.9597e-09	1.65959e-08
ENSG00000188676	IDO2	chr8	39934614	40016391	+	-0.499265	5.28346e-33	3.40489e-32	0.0428271	0.105159	2.87949e-18	2.50516e-17	0.0739931	0.0308268	0.000491715	0.000838808
ENSG00000178209	PLEC	chr8	143915147	143976734	-	0.300606	7.71826e-12	1.79064e-11	6.19502	5.81482	1.68957e-07	3.41844e-07	6.00492	5.14716	1.65164e-10	6.84253e-10
ENSG00000120217	CD274	chr9	5450503	5470566	+	-0.146982	0.000967562	0.00122887	1.79151	2.09266	0.00404834	0.00510442	1.94208	1.26534	4.59006e-05	8.97383e-05
ENSG00000197919	IFNA1	chr9	21409169	21441316	+	0.124952	0.00505338	0.00614887	0.0629423	0.0452321	0.0108498	0.0132018	0.0540872	0.0164168	0.00083091	0.00136395
ENSG00000181634	TNFSF15	chr9	114784635	114806126	-	-0.316304	5.27968e-13	1.3314e-12	0.413072	0.69235	9.95398e-09	2.27894e-08	0.552711	0.83634	0.00234929	0.00368267
ENSG00000134460	IL2RA	chr10	6010689	6062325	-	-0.338155	9.06711e-15	2.92163e-14	1.28473	1.78225	1.13625e-11	4.11892e-11	1.53349	0.695789	7.32877e-12	3.75061e-11
ENSG00000168283	BMI1	chr10	22321211	22331484	+	-0.274657	4.58102e-10	9.05792e-10	2.60642	2.90366	1.99604e-10	5.98813e-10	2.75504	2.46608	0.000211522	0.000379432
ENSG00000170312	CDK1	chr10	60778331	60794852	+	-0.310379	1.48282e-12	3.63396e-12	3.60124	3.93311	2.57102e-07	5.02648e-07	3.76717	2.31342	1.82991e-20	3.18405e-19
ENSG00000180644	PRF1	chr10	70597348	70602775	-	-0.374789	0	0	1.96748	2.75736	6.90789e-14	3.53521e-13	2.36242	1.51523	1.10555e-06	2.63515e-06
ENSG00000107738	C10orf54	chr10	71747559	71773498	-	-0.215407	1.1765e-06	1.84425e-06	3.74604	4.03709	9.83437e-06	1.64537e-05	3.89157	4.22327	0.00711731	0.0104068
ENSG00000138185	ENTPD1	chr10	95711779	95877266	+	-0.336245	1.31926e-14	4.09913e-14	1.66569	1.98481	4.50381e-12	1.74147e-11	1.82525	1.36085	7.30579e-09	2.31129e-08
ENSG00000026508	CD44	chr11	35138870	35232402	+	0.271465	7.36022e-10	1.40734e-09	6.68694	6.40636	1.93311e-05	3.08588e-05	6.54665	5.76905	4.83165e-11	2.15566e-10
ENSG00000188486	H2AFX	chr11	119093854	119095467	-	-0.194323	1.20645e-05	1.73489e-05	5.07045	5.30969	0.000336133	0.000479403	5.19007	4.22281	1.32954e-11	6.60972e-11
ENSG00000149554	CHEK1	chr11	125625136	125676255	+	-0.209738	2.25197e-06	3.46764e-06	2.011	2.19642	5.9536e-05	9.00806e-05	2.10371	1.14782	1.98092e-21	5.74466e-20
ENSG00000139193	CD27	chr12	6444867	6451718	+	-0.523954	0	0	1.40587	2.52637	7.32471e-24	4.24833e-22	1.96612	1.29049	0.00028551	0.000496787
ENSG00000089692	LAG3	chr12	6772512	6778455	+	-0.381762	0	0	1.35162	2.08604	2.34913e-14	1.23863e-13	1.71883	0.707834	3.59483e-11	1.64605e-10
ENSG00000134545	KLRC1	chr12	10442264	10454685	-	-0.303777	3.54375e-12	8.3326e-12	0.230852	0.393431	1.5874e-10	5.11496e-10	0.312141	0.151095	0.00108946	0.00173914
ENSG00000111424	VDR	chr12	47841537	47943048	-	0.251632	1.22581e-08	2.19887e-08	3.52339	3.3121	1.23713e-05	2.05011e-05	3.41774	2.83712	7.0293e-07	1.74728e-06
ENSG00000110944	IL23A	chr12	56334174	56340410	+	-0.327959	6.39179e-14	1.85362e-13	1.5222	2.00429	1.1624e-09	2.97437e-09	1.76325	1.22422	5.89996e-05	0.000112812
ENSG00000135446	CDK4	chr12	57747727	57756013	-	-0.229508	2.17001e-07	3.56209e-07	4.63835	4.89689	6.57709e-06	1.12197e-05	4.76762	3.87363	1.0344e-18	1.63624e-17
ENSG00000111537	IFNG	chr12	68154768	68159747	-	-0.364377	3.30154e-17	1.40114e-16	0.358468	0.761748	3.21198e-13	1.47075e-12	0.560108	0.169033	4.69479e-08	1.29666e-07
ENSG00000189403	HMGB1	chr13	30456704	30617597	-	-0.246339	2.49942e-08	4.30593e-08	4.47523	4.70098	1.10905e-06	2.05293e-06	4.58811	4.27698	3.7492e-05	7.41319e-05
ENSG00000120659	TNFSF11	chr13	42562736	42608013	+	-0.122158	0.00613588	0.00741419	0.449937	0.561642	0.0111857	0.0135161	0.505789	0.137393	1.55663e-12	8.73722e-12
ENSG00000136160	EDNRB	chr13	77895481	77919768	-	-0.16071	0.000305071	0.000399115	0.785843	0.921701	0.00321529	0.00411368	0.853772	1.26502	0.00306261	0.00471588
ENSG00000131981	LGALS3	chr14	55124110	55145413	+	-0.155526	0.000476971	0.00061935	6.22915	6.42583	0.00177911	0.00232756	6.32749	6.80684	3.49795e-05	7.16051e-05
ENSG00000103855	CD276	chr15	73683966	73714518	+	0.297599	1.26576e-11	2.89793e-11	4.81703	4.48696	1.08174e-06	2.02391e-06	4.65199	2.72449	1.5342e-23	8.89838e-22
ENSG00000006327	TNFRSF12A	chr16	3018445	3022383	+	0.347631	1.29963e-15	4.43404e-15	5.76481	5.2346	7.16998e-09	1.68591e-08	5.49971	3.77965	3.91394e-15	2.8376e-14
ENSG00000178999	AURKB	chr17	8204733	8210600	-	-0.218913	7.80638e-07	1.25769e-06	3.75349	4.07208	3.76061e-05	5.84237e-05	3.91278	2.08486	5.51804e-23	2.40035e-21
ENSG00000271503	CCL5	chr17	35871491	35880793	-	-0.254775	7.96896e-09	1.44437e-08	4.4504	5.21638	5.18779e-08	1.08756e-07	4.83339	3.36416	7.48552e-10	2.7135e-09
ENSG00000125657	TNFSF9	chr19	6530999	6535928	+	0.169097	0.000143854	0.000194035	2.49567	2.22972	0.00122179	0.001648	2.3627	1.53988	2.55135e-07	6.82977e-07
ENSG00000125726	CD70	chr19	6583183	6604103	-	-0.168068	0.000158048	0.000209927	1.18138	1.45152	0.000705108	0.000973721	1.31645	0.343792	1.20291e-15	9.51392e-15
ENSG00000182393	IFNL1	chr19	39296325	39298673	+	-0.119566	0.00732117	0.0087854	0.229522	0.277614	0.00308817	0.00398031	0.253568	0.0274105	2.80797e-11	1.32051e-10
ENSG00000105329	TGFB1	chr19	41301587	41353911	-	0.281549	1.61225e-10	3.30036e-10	5.53807	5.2789	1.19131e-06	2.18198e-06	5.40849	3.61425	3.46424e-25	6.02778e-23
ENSG00000204577	LILRB3	chr19	54216278	54223506	-	-0.283271	1.23644e-10	2.5612e-10	0.472657	0.669867	9.77523e-10	2.57711e-09	0.571262	0.344188	7.5521e-07	1.8508e-06
ENSG00000244482	LILRA6	chr19	54216868	54242800	-	-0.217382	9.34494e-07	1.4782e-06	0.400729	0.556834	2.94938e-06	5.18376e-06	0.478781	0.203802	4.45205e-09	1.51893e-08
ENSG00000131042	LILRB2	chr19	54238904	54281184	-	-0.247313	2.1949e-08	3.81913e-08	1.18919	1.56989	6.12156e-08	1.26804e-07	1.37954	0.781409	4.117e-08	1.15542e-07
ENSG00000187116	LILRA5	chr19	54307070	54313139	-	-0.169646	0.000136778	0.000185932	0.960071	1.18795	3.74056e-05	5.84237e-05	1.07401	0.670736	6.81609e-07	1.71884e-06
ENSG00000167613	LAIR1	chr19	54351384	54370558	-	-0.306163	3.04518e-12	7.25839e-12	1.143	1.56775	1.31417e-09	3.314e-09	1.35537	0.899233	3.73301e-05	7.41319e-05
ENSG00000167618	LAIR2	chr19	54497879	54510687	+	-0.356938	1.57454e-16	5.70772e-16	0.346036	0.613874	1.77757e-16	1.34477e-15	0.479955	0.098025	3.71736e-16	3.40432e-15
ENSG00000104972	LILRB1	chr19	54617158	54700954	+	-0.37068	0	0	0.677648	1.08325	1.51053e-13	7.30087e-13	0.880449	0.487065	6.40819e-07	1.63974e-06
ENSG00000186818	LILRB4	chr19	54643889	54670359	+	-0.313808	8.18284e-13	2.03402e-12	1.19729	1.79091	1.72749e-10	5.36755e-10	1.4941	0.704348	5.17197e-09	1.66652e-08
ENSG00000243772	KIR2DL3	chr19	54724459	54767884	+	-0.325153	7.96062e-14	2.23411e-13	0.0212165	0.0592492	9.65125e-10	2.57711e-09	0.0402329	0.0122635	0.0115286	0.0165784
ENSG00000125498	KIR2DL1	chr19	54769811	54784322	+	-0.278224	2.24082e-10	4.53376e-10	0.0293865	0.0721671	2.24979e-08	4.8933e-08	0.0507768	0.0219475	0.0136812	0.0188931
ENSG00000101307	SIRPB1	chr20	1563521	1620061	-	-0.241645	4.20342e-08	7.03264e-08	0.225676	0.371183	9.97386e-07	1.88636e-06	0.29843	0.124617	1.65843e-06	3.89956e-06
ENSG00000198053	SIRPA	chr20	1894167	1940592	+	0.244067	3.3772e-08	5.7611e-08	4.33374	3.99209	4.36506e-05	6.72143e-05	4.16292	3.32386	2.00982e-09	7.13692e-09
ENSG00000101017	CD40	chr20	46118272	46129863	+	-0.354708	2.6597e-16	9.44463e-16	3.0694	3.67813	5.21928e-13	2.3286e-12	3.37377	2.82832	3.68483e-05	7.41319e-05
ENSG00000160223	ICOSLG	chr21	44222991	44240966	-	-0.392827	0	0	0.185557	0.338568	1.6649e-15	1.03462e-14	0.262062	0.269277	0.0116398	0.016601
ENSG00000160255	ITGB2	chr21	44885953	44931989	-	-0.357056	1.50324e-16	5.5652e-16	2.86908	3.62865	2.70234e-12	1.06865e-11	3.24886	2.5594	0.000104352	0.000197362
ENSG00000128271	ADORA2A	chr22	24417879	24442360	+	-0.49442	2.63755e-32	1.52978e-31	0.042302	0.100827	3.18936e-19	3.26441e-18	0.0715643	0.0346684	0.000776463	0.00128671
ENSG00000100385	IL2RB	chr22	37125838	37175054	-	-0.404001	0	0	1.81682	2.56125	1.5711e-14	8.81841e-14	2.18903	1.64187	0.000893267	0.0014526
ENSG00000101916	TLR8	chrX	12906620	12923169	+	-0.289653	4.55168e-11	9.77768e-11	0.493378	0.785961	1.33869e-08	2.98632e-08	0.63967	0.348969	0.000722359	0.00120856
ENSG00000010671	BTK	chrX	101349447	101390796	-	-0.450539	0	0	0.725247	1.1881	9.33514e-19	8.54902e-18	0.956673	0.733509	0.012144	0.0170408
ENSG00000102245	CD40LG	chrX	136648193	136660390	+	-0.488036	2.11019e-31	1.18443e-30	0.171719	0.476217	3.63905e-19	3.51774e-18	0.323968	0.524838	9.26757e-06	2.04121e-05

## Sheet: Table S5
Table S5. Potential drugs of PFLS and its related genes.
Drug	FElncRNA	Sensitivity	FC
3 3' 4 4'-tetrachlorobiphenyl	SFTA1P	down-regulated	0.487
Adenosinetriphosphate	SFTA1P	down-regulated	0.248
Afimoxifene	SFTA1P	down-regulated	0.478
Alfacalcidol	SFTA1P	down-regulated	0.476
Argyrina	SFTA1P	down-regulated	0.394
Bisphenola	SFTA1P	down-regulated	0.359
Citalopram	SFTA1P	down-regulated	0.159
Cyfluthrin	SFTA1P	down-regulated	0.482
Foretinib	SFTA1P	down-regulated	0.392
Harman	SFTA1P	down-regulated	0.323
Mk-886	SFTA1P	down-regulated	0.315
Mln4924	SFTA1P	down-regulated	0.407
Nvp-tnks656(tankyraseinhibitor)	SFTA1P	down-regulated	0.47
Pimecrolimus	SFTA1P	down-regulated	0.449
Pioglitazone	SFTA1P	down-regulated	0.383
Rituximab	SFTA1P	down-regulated	0.4
Sangivamycin(nsc65346)	SFTA1P	down-regulated	0.374
2 2' 4 4' 5 5'-hexachlorobiphenyl(pcb-153)	SFTA1P	up-regulated	2.505
Chlorambucil	SFTA1P	up-regulated	2.808
Mln4924	SFTA1P	up-regulated	2.998
Motexafingadolinium	SFTA1P	up-regulated	2.424
Nitricoxide	SFTA1P	up-regulated	2.465
Paclitaxel	SFTA1P	up-regulated	5.38
Stanolone	SFTA1P	up-regulated	3.486
Panobinostat	SFTA1P	up-regulated	-
Chlorpyrifos	PCED1B-AS1	down-regulated	0.404
Cyfluthrin	PCED1B-AS1	down-regulated	0.46
Harman	PCED1B-AS1	down-regulated	0.478
Lapatinib	PCED1B-AS1	down-regulated	0.486
Nvp-tnks656	PCED1B-AS1	down-regulated	0.265
Sangivamycin(nsc65346)	PCED1B-AS1	down-regulated	0.416
Afimoxifene	C1RL-AS1	up-regulated	2.031
